# Supplementary material for: A cross-sectional study of glucose regulation in young adults with very low birth weight: impact of male gender on hyperglycaemia
Source: PubMed Central journal article supplement — BMJ Open. 2012 Feb 3;2(1):e000327. doi: 10.1136/bmjopen-2011-000327 (PMC3274711; doi:10.1136/bmjopen-2011-000327), 2012-02-03
Supplement: bmjopen-2011-000327.draft_revisions.pdf [file bmjopen-2011-000327.draft_revisions.pdf]

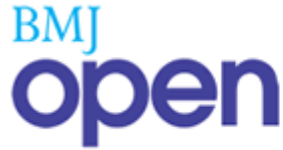

## Delayed impact of very low birth weight on glucose regulation: observational study

|                                 |                                                                                                                                                                                                                                                                                                                                                                                                                                                                                                                                                                                                                                                                                                                                                                                                                                                                                                                                                                                                                                                                                                                                                                                 |
|---------------------------------|---------------------------------------------------------------------------------------------------------------------------------------------------------------------------------------------------------------------------------------------------------------------------------------------------------------------------------------------------------------------------------------------------------------------------------------------------------------------------------------------------------------------------------------------------------------------------------------------------------------------------------------------------------------------------------------------------------------------------------------------------------------------------------------------------------------------------------------------------------------------------------------------------------------------------------------------------------------------------------------------------------------------------------------------------------------------------------------------------------------------------------------------------------------------------------|
| Journal:                        | <i>BMJ Open</i>                                                                                                                                                                                                                                                                                                                                                                                                                                                                                                                                                                                                                                                                                                                                                                                                                                                                                                                                                                                                                                                                                                                                                                 |
| Manuscript ID:                  | bmjopen-2011-000327                                                                                                                                                                                                                                                                                                                                                                                                                                                                                                                                                                                                                                                                                                                                                                                                                                                                                                                                                                                                                                                                                                                                                             |
| Article Type:                   | Research                                                                                                                                                                                                                                                                                                                                                                                                                                                                                                                                                                                                                                                                                                                                                                                                                                                                                                                                                                                                                                                                                                                                                                        |
| Date Submitted by the Author:   | 19-Aug-2011                                                                                                                                                                                                                                                                                                                                                                                                                                                                                                                                                                                                                                                                                                                                                                                                                                                                                                                                                                                                                                                                                                                                                                     |
| Complete List of Authors:       | Sato, Ryosuke; Hamamatsu University School of Medicine, Department of Endocrinology and Metabolism, Division of Internal Medicine II; Seirei Hamamatsu General Hospital, Department of Endocrinology and Metabolism<br>Watanabe, Hiroshi; Hamamatsu University School of Medicine, Department of Clinical Pharmacology and Therapeutics<br>Shirai, Kenji; Seirei Hamamatsu General Hospital, Department of Neonatology<br>Ohki, Shigeru; Seirei Hamamatsu General Hospital, Department of Neonatology<br>Genma, Rieko; Seirei Hamamatsu General Hospital, Department of Endocrinology and Metabolism<br>Morita, Hiroshi; Hamamatsu University School of Medicine, Department of Endocrinology and Metabolism, Division of Internal Medicine II<br>Inoue, Eisuke; Kitasato University, Department of Clinical Medicine (Biostatistics)<br>Takeuchi, Masahiro; Kitasato University, Department of Clinical Medicine (Biostatistics)<br>Maekawa, Masato; Hamamatsu University School of Medicine, Department of Laboratory Medicine<br>Nakamura, Hirotoishi; Hamamatsu University School of Medicine, Department of Endocrinology and Metabolism, Division of Internal Medicine II |
| <b>Primary Subject Heading</b>: | Diabetes and endocrinology                                                                                                                                                                                                                                                                                                                                                                                                                                                                                                                                                                                                                                                                                                                                                                                                                                                                                                                                                                                                                                                                                                                                                      |
| Keywords:                       | Diabetes Mellitus, Very low birth weight (VLBW), Small for gestational age (SGA), Gender difference, Oral glucose tolerance test (OGTT)                                                                                                                                                                                                                                                                                                                                                                                                                                                                                                                                                                                                                                                                                                                                                                                                                                                                                                                                                                                                                                         |
|                                 |                                                                                                                                                                                                                                                                                                                                                                                                                                                                                                                                                                                                                                                                                                                                                                                                                                                                                                                                                                                                                                                                                                                                                                                 |

SCHOLARONE™  
Manuscripts

1  
2  
3  
4  
5  
6  
7  
8  
9  
10  
11  
12  
13  
14  
15  
16  
17  
18  
19  
20  
21  
22  
23  
24  
25  
26  
27  
28  
29  
30  
31  
32  
33  
34  
35  
36  
37  
38  
39  
40  
41  
42  
43  
44  
45  
46  
47  
48  
49  
50  
51  
52  
53  
54  
55  
56  
57  
58  
59  
60

For peer review only

1  
2  
3  
4  
5  
6  
7 **Delayed impact of very low birth weight on glucose regulation:**  
8  
9  
10 **observational study**  
11

12 Ryosuke Sato,<sup>1,2</sup> Hiroshi Watanabe,<sup>3</sup> Kenji Shirai,<sup>4</sup> Shigeru Ohki,<sup>4</sup> Rieko Genma,<sup>2</sup>

15 Hiroshi Morita,<sup>1</sup> Eisuke Inoue,<sup>5</sup> Masahiro Takeuchi,<sup>5</sup> Masato Maekawa,<sup>6</sup> Hirotoshi

17  
18  
19 Nakamura<sup>1</sup>  
20  
21  
22  
23  
24

25 **Address and Affiliations (position)**  
26

27  
28 <sup>1</sup>Department of Endocrinology and Metabolism, Division of Internal Medicine II, Hamamatsu  
29 University School of Medicine, 1-20-1, Handayama, Higashi-ku, Hamamatsu, 431-3192, Japan.

30 Ryosuke Sato: Physician

31 Hiroshi Morita: Physician

32 Hirotoshi Nakamura: Professor  
33  
34

35  
36  
37 <sup>2</sup>Department of Endocrinology and Metabolism, Seirei Hamamatsu General Hospital, 2-12-12,  
38 Sumiyoshi, Naka-ku, Hamamatsu, 430-8558, Japan.

39 Ryosuke Sato: Physician

40 Rieko Genma: Physician  
41  
42  
43

44  
45 <sup>3</sup>Department of Clinical Pharmacology and Therapeutics, Hamamatsu University School of  
46 Medicine, Hamamatsu University School of Medicine, 1-20-1, Handayama, Higashi-ku, Hamamatsu,  
47 431-3192, Japan.

48 Hiroshi Watanabe: Professor  
49  
50  
51

52  
53 <sup>4</sup>Department of Neonatology, Seirei Hamamatsu General Hospital, 2-12-12, Sumiyoshi, Naka-ku,  
54 Hamamatsu, 430-8558, Japan.

55 Kenji Shirai: neonatologist

56 Shigeru Ohki: neonatologist  
57  
58  
59

60 <sup>5</sup>Department of Clinical Medicine (Biostatistics), Kitasato University, 5-9-1, Shirokane, Minato-ku,

1  
2  
3  
4  
5  
6 Tokyo, 108-8641, Japan.

7 Eisuke Inoue: statistician

8  
9 Masahiro Takeuchi: Professor

10  
11  
12 <sup>6</sup>Department of Laboratory Medicine, Hamamatsu University School of Medicine, 1-20-1,  
13 Handayama, Higashi-ku, Hamamatsu, 431-3192, Japan.

14  
15 Masato Maekawa: Professor

16  
17  
18  
19 **Correspondence:** Ryosuke Sato, MD, Department of Endocrinology and Metabolism,

20  
21  
22 Division of Internal Medicine II, Hamamatsu University School of Medicine, 1-20-1,

23  
24  
25 Handayama, Higashi-ku, Hamamatsu, 431-3192, Japan. Tel: +81-53-435-2385; Fax:

26  
27  
28 +81-53-435-2386; E-mail: ryos@hama-med.ac.jp

29  
30  
31 Word counts for the abstract: 294

32  
33  
34 Word counts for the manuscript: 2200

35  
36  
37 The number of Bibliography: 27

38  
39  
40 The number of figures: 2

41  
42  
43 The number of tables: 3

44  
45  
46 **Keywords:** diabetes mellitus, very low birth weight (VLBW), small for gestational age

47  
48  
49 (SGA), gender difference, oral glucose tolerance test (OGTT)

## ABSTRACT

**Background:** In recent decades, neonatal intensive care has been progressing dramatically and contributed to the improvement in survival rate of very low birth weight (VLBW; <1500g) infants. Although a lot of the first generation of VLBW infants are currently in their twenties or thirties, glucose regulation in their young adulthood is still uncertain.

**Objectives:** To investigate delayed impact of VLBW on glucose regulation in young adults.

**Design:** A cross-sectional, observational study included 111 young adults (42 men and 69 women; aged 19-30 years) born with VLBW between 1980 and 1990. Participants underwent standard 75-g oral glucose tolerance test (OGTT). Glucose and insulin levels during OGTT, the pancreatic beta cell function (insulinogenic index and homeostasis model of assessment for beta cell [HOMA- $\beta$ ]), and insulin resistance (homeostasis model of assessment for insulin resistance [HOMA-IR]) were evaluated.

**Results:** Of 111 young adults with VLBW, 21 subjects (19%) had glucose intolerance: 1 type 2 diabetes; 6 impaired glucose tolerance (IGT); 1 impaired fasting glycaemia (IFG); 13 non-diabetes/IGT/IFG with elevated 1-hour glucose levels (>8.6 mmol/l). In logistic regression analysis, male gender was an independent risk factor associated with glucose

1  
2  
3  
4  
5  
6  
7 intolerance (OR: 3.34; 95%CI: 1.08-10.3; p=0.036). Men had higher levels of glucose  
8  
9  
10 (p<0.001) and lower levels of insulin (p=0.005) than women during OGTT. Pancreatic  
11  
12  
13 beta cell function was lower in men (insulinogenic index: p=0.002; HOMA- $\beta$ : p=0.001),  
14  
15  
16 although no gender difference was found in insulin resistance (HOMA-IR: p=0.48). In  
17  
18  
19 male subjects, logistic regression analysis showed that small for gestational age (SGA)  
20  
21  
22 was an independent risk factor associated with glucose intolerance (OR: 33.3; 95%CI:  
23  
24  
25 1.67-662.6; p=0.022).  
26  
27

28 **Conclusions:** 19% of individuals with VLBW already had glucose intolerance in young  
29  
30  
31 adulthood, and male gender was a significant independent risk factor of glucose  
32  
33  
34 intolerance. In male young adults with VLBW, SGA was associated with glucose  
35  
36  
37 intolerance.  
38  
39  
40  
41  
42  
43  
44  
45  
46  
47  
48  
49  
50  
51  
52  
53  
54  
55  
56  
57  
58  
59  
60

## ARTICLE SUMMARY

### Article focus

- Neonatal intensive care has improved the survival rate for very low birth weight infants (VLBW; birth weight <1500g) in recent decades, and the first generation of VLBW infants have only recently reached young adulthood.
- Previous studies have shown the influence of low birth weight (birth weight <2500g) on type 2 diabetes and cardiovascular disease in later life.
- However, the glucose regulation in young adults with VLBW (<1500g) is still uncertain.

### Key messages

- Of 111 young adults with VLBW in Asian population, 19% of individuals already had glucose intolerance.
- Male gender was a significant independent risk factor of glucose intolerance in young adults with VLBW.
- Small for gestational age (SGA) was associated with glucose intolerance particularly in male young adults with VLBW.

### Strengths and limitations of this study

- This is a first study assessing the glucose regulation in young adults with VLBW in Asian population.
- Our study includes a relatively large number of young adults with VLBW.
- We could not obtain information regarding the postnatal growth pattern, which had been shown to be associated with later glucose intolerance in previous studies.



## INTRODUCTION

In recent decades, progression of neonatal intensive care has dramatically increased the survival rate of very low birth weight (VLBW; birth weight <1500g) infants worldwide.<sup>1</sup> A lot of them have grown up into young adult (now in their twenties or thirties). To date, epidemiological studies have shown an association between low birth weight and type 2 diabetes and cardiovascular disease in later life.<sup>2-4</sup> Fetal malnutrition in the gestational period, which prevents appropriate fetal growth in utero, is thought to provoke thrifty phenotype in premature babies. This phenotype is assumed to predispose them to subsequent metabolic disorders. For this reason, to foresee the later risk of type 2 diabetes is very crucial for VLBW infants. If prediction is possible, it would lead to early intervention in their lifestyle and subsequently contribute to prevention of type 2 diabetes.<sup>5-7</sup>

However, only a few studies have examined the association between VLBW and glucose regulation in young adulthood<sup>8</sup> because the first generation of VLBW infants have only recently reached young adulthood. To clarify the delayed impact of VLBW on glucose regulation, we investigated glucose regulation in 111 young adults with VLBW by performing detailed oral glucose tolerance test (OGTT), which is useful for evaluation of early signs of glucose intolerance.

## METHODS

### Study Participants

The birth record database of Seirei Hamamatsu General Hospital (Hamamatsu, Japan) showed that 628 subjects were born with VLBW between 1980 and 1990, and were treated at a neonatal intensive care unit (**Figure 1**). VLBW infants were defined according to the World Health Organization (WHO) criteria: babies whose birth weight was less than 1500g. Out of the 628 subjects, 229 were excluded because of death or severe neurodevelopmental impairment. To the remaining 399 subjects, we sent letters which provided information regarding the study and requested their participation. Among the 399 letters, 98 were returned marked as address unknown (i.e. the remaining 301 letters were thought to reach their destinations). Consequently, 111 subjects (aged 19-30 years) participated in the present study. All participants were Japanese. Small for gestational age (SGA) status was determined according to standards by a study group of the Health Ministry in Japan: a birth weight below the 10th percentile for gestational age. The basal characteristics of participants at birth are summarized in **Table 1**.

### Measurements

All participants underwent a standard 75-g OGTT after a ten-hour overnight fast.

1  
2  
3  
4  
5  
6  
7 Plasma glucose and serum insulin concentrations were examined at 0, 30, 60, 90, 120,  
8  
9  
10 and 180 minutes during OGTT. Fasting glucose levels and 2-hour glucose levels were  
11  
12 used for diagnosing diabetes mellitus, impaired glucose tolerance (IGT), and impaired  
13  
14 fasting glycaemia (IFG) according to the WHO criteria. Since it has been shown that  
15  
16 1-hour plasma glucose concentration is associated with future risk of type 2 diabetes  
17  
18 and atherosclerosis, 1-hour plasma glucose above 8.6 mmol/l (155 mg/dl) was included  
19  
20 in glucose intolerance.<sup>9 10</sup> Reactive hypoglycemia during OGTT was defined as the level  
21  
22 of plasma glucose less than 3.8 mmol/l which causes the response of counter-regulatory  
23  
24 hormone release.<sup>11</sup>

25  
26  
27  
28  
29  
30  
31  
32  
33  
34 We measured plasma glucose and serum insulin levels during OGTT with an  
35  
36 autoanalyzer JCA-BM2250 (JEOL, Tokyo, Japan). Plasma glucose was measured by  
37  
38 means of hexokinase method. The concentration of serum insulin was measured with  
39  
40 chemiluminescent enzyme immunoassay (CLIA). Fasting blood samples were also  
41  
42 drawn for other measurements; total cholesterol, high-density lipoprotein (HDL)  
43  
44 cholesterol, low-density lipoprotein (LDL) cholesterol, triglyceride, and creatinine.  
45  
46  
47  
48  
49  
50  
51  
52 Glycated haemoglobin A1c (HbA1c) was measured with high-performance liquid  
53  
54 chromatography (HPLC) method using an automated glycohaemoglobin analyzer  
55  
56 HLC-723G8 (Tosoh Bioscience, Tokyo, Japan). The values for HbA1c were converted  
57  
58  
59  
60

1  
2  
3  
4  
5  
6  
7 from Japanese Diabetes Society (JDS) values into National Glycohaemoglobin  
8  
9  
10 Standardization Program (NGSP) equivalent values. NGSP equivalent values were  
11  
12  
13 calculated with the formula: HbA1c (%) = JDS value (%) +0.4 (<http://www.jds.or.jp>).  
14  
15

### 16 17 18 19 **Calculations and Statistical analysis**

20  
21  
22 Pancreatic beta cell function was evaluated by both insulinogenic index and  
23  
24  
25 homeostasis model of assessment for beta cell (HOMA- $\beta$ ).<sup>12</sup> Insulinogenic index, the  
26  
27  
28 index of early-phase insulin secretion, was calculated as the ratio of the increment in  
29  
30  
31 insulin concentration to the increment in glucose concentration ([30-min insulin  
32  
33  
34 ( $\mu\text{U/ml}$ )–fasting insulin]/[30-min glucose (mmol/l) – fasting glucose]). HOMA- $\beta$  was  
35  
36  
37 calculated as follows:  $20 \times \text{fasting insulin } (\mu\text{U/ml}) / [\text{fasting glucose (mmol/l)} - 3.5]$ .  
38  
39  
40 Insulin resistance was estimated by homeostasis model of assessment for insulin  
41  
42  
43 resistance (HOMA-IR):  $\text{fasting insulin } (\mu\text{U/ml}) \times \text{fasting glucose (mmol/l)} / 22.5$ .<sup>12</sup> The  
44  
45  
46 total amounts of glucose and insulin levels during OGTT were assessed by calculating  
47  
48  
49 areas under the curve (AUC) with trapezoid rules. The estimated glomerular filtration  
50  
51  
52 rate (eGFR) was calculated according to the Modification of Diet in Renal Disease  
53  
54  
55 (MDRD) study equation.  
56  
57

58  
59 Quantitative variables were expressed as mean and standard deviation (SD) or 95%  
60

1  
2  
3  
4  
5  
6  
7 confidence interval (CI); categorical variables were presented as number and percentage.

8  
9  
10 Differences between groups were compared using the Student's t-test, the  
11  
12 Mann–Whitney U test, the Pearson's  $\chi^2$  test, or the repeated measure analysis of  
13  
14 variance (ANOVA) as appropriate. A p-value of less than 0.05 was defined as  
15  
16 statistically significant. All analyses were conducted using SAS software version 9.2  
17  
18 (SAS Institute, Cary, North Carolina, USA) and the statistical software R version 2.12.2  
19  
20 (http://www.r-project.org).  
21  
22  
23  
24  
25  
26  
27  
28  
29  
30

## 31 RESULTS

32  
33  
34 The basic characteristics of participants at study assessment are shown in **Table 1**. Of  
35  
36 111 young adults with VLBW, 21 subjects (19%) had glucose intolerance: one had type  
37  
38 2 diabetes; six had impaired glucose tolerance (IGT); one had impaired fasting  
39  
40 glycaemia (IFG); 13 non-diabetes/IGT/IFG subjects had elevated 1-hour glucose levels  
41  
42 (>8.6 mmol/l). Glucose intolerance was more frequent in men than women (26.2 % for  
43  
44 men vs 14.5 % for women). In the logistic regression analysis adjusted for family  
45  
46 history of diabetes within the second degree, BMI, gestational age, birth weight and  
47  
48 SGA/AGA (appropriate for gestational age), male gender was a statistically significant  
49  
50 independent factor associated with glucose intolerance (Odds ratio: 3.34; 95% CI:  
51  
52  
53  
54  
55  
56  
57  
58  
59  
60

1  
2  
3  
4  
5  
6  
7 1.08-10.3;  $p= 0.036$ ). BMI at study assessment was also a significant independent risk  
8  
9  
10 factor of glucose intolerance (**Table 2**).

### 16 **Gender difference**

17  
18 As male gender was a significant independent risk factor of glucose intolerance, we  
19  
20 evaluated the differences in glucose regulation between men and women in the sample  
21  
22 group. **Figure 2** shows the glucose and insulin response during OGTT in men and  
23  
24 women. Men had significantly higher levels of glucose and lower levels of insulin  
25  
26 during OGTT than women by repeated measure ANOVA.  $\text{Glucose}_{\text{AUC}}$  during OGTT  
27  
28 also tended to be higher in men (**Table 3**). As for the function of insulin secretion,  
29  
30 insulinogenic index and HOMA- $\beta$  were significantly lower in men than in women.  
31  
32  $\text{Insulin}_{\text{AUC}}$  also showed a tendency to be lower in men. Reactive hypoglycemia during  
33  
34 OGTT tended to be frequent in men. The differences in the mean values of HbA1c and  
35  
36 HOMA-IR were not statistically significant. There were no significant gender  
37  
38 differences in gestational age ( $p=0.15$ ), birth weight ( $p=0.17$ ), age at study assessment  
39  
40 ( $p=0.85$ ), BMI ( $p=0.88$ ), the proportion of SGA ( $p=0.76$ ), and that of family history of  
41  
42 diabetes within the second degree ( $p=0.52$ ). The variables for glucose metabolism in  
43  
44 men and women are summarized in **Table 3**.

45  
46  
47  
48  
49  
50  
51  
52  
53  
54  
55  
56  
57  
58  
59  
60

1  
2  
3  
4  
5  
6  
7 We evaluated the associations between gender and the variables of glucose metabolism  
8  
9  
10 by multiple linear regression analysis. Adjustments were made for family history of  
11  
12 diabetes within the second degree, BMI, gestational age, birth weight, and SGA/AGA  
13  
14 (variables were logarithmically transformed before analysis). In this analysis, male  
15  
16 gender had inverse associations with HOMA- $\beta$  ( $\beta$ : -0.336; 95% CI: -0.509 to -0.163;  $p$ <  
17  
18 0.001) and insulinogenic index ( $\beta$ : -0.195; 95% CI: -0.344 to -0.047;  $p$ =0.01).  
19  
20  
21  
22  
23  
24  
25  
26  
27  
28  
29  
30  
31  
32  
33  
34  
35  
36  
37  
38  
39  
40  
41  
42  
43  
44  
45  
46  
47  
48  
49  
50  
51  
52  
53  
54  
55  
56  
57  
58  
59  
60  
Glucose<sub>AUC</sub> during OGTT tended to be positively associated with male gender ( $\beta$ : 0.056;  
95% CI: -0.0047 to 0.116;  $p$ =0.071).

In male subjects, after an adjustment for family history of diabetes, BMI, gestational age, and birth weight, the logistic regression analysis showed that SGA was a statistically significant independent factor associated with glucose intolerance (Odds ratio: 33.3; 95% CI: 1.67-662.6;  $p$ =0.022).

## DISCUSSION

To the best of our knowledge, this is a first study assessing the glucose regulation in young adults with VLBW in Asian population. Our study has indicated that 19% of young adults with VLBW already had glucose intolerance: type 2 diabetes; IGT; IFG; and non-diabetes/IGT/IFG with high 1-hour plasma glucose level. A report from the

1  
2  
3  
4  
5  
6  
7 Japanese Ministry of Health, Welfare, and Labour in 2007 showed that of 204 general  
8  
9  
10 young adults (aged 20-29 years), 2 individuals (0.98%) had high levels of HbA1c (more  
11  
12 than 6.0%; NGSP equivalent values), while 3.6% of young adults with VLBW had the  
13  
14  
15 HbA1c values more than 6.0% in the present study. In a previous study, Hovi et al.  
16  
17 reported that VLBW infants in young adulthood had higher indexes of glucose  
18  
19 intolerance compared with term infants.<sup>8</sup> On the other hand, a recent study in the  
20  
21  
22 Netherlands showed that preterm birth was not associated with reduced insulin  
23  
24  
25 sensitivity in young adulthood.<sup>13</sup> Even though the glucose regulation of premature  
26  
27  
28 infants in young adulthood is still controversial, our findings support the standpoint of  
29  
30  
31 high prevalence of glucose intolerance in premature infants in young adulthood.  
32  
33  
34  
35

36  
37 We have also found that male subjects had higher glucose levels during OGTT than  
38  
39  
40 females. Previous studies in the general population showed that women had higher  
41  
42  
43 postload glucose levels than men, which were explained by differences in body size.<sup>14 15</sup>  
44  
45  
46 During standard 75-g OGTT, men and women take the same amount of glucose, which  
47  
48  
49 is thought to be high dosage for women relative to their body size. In our study,  
50  
51  
52 however, men had significantly higher levels of both fasting and postload glucose  
53  
54  
55 concentrations during OGTT. Moreover, male gender was associated with lower beta  
56  
57  
58 cell function and the risk of glucose intolerance. These findings might indicate that men  
59  
60



1  
2  
3  
4  
5  
6  
7 with VLBW are more predisposed to diabetes than women; indeed, recent studies have  
8  
9  
10 shown that male premature infants are more vulnerable than females.<sup>16-21</sup> In particular,  
11  
12 the male sex is associated with various adverse outcomes including death,<sup>19 21</sup>  
13  
14 respiratory dysfunction,<sup>16</sup> intraventricular hemorrhage,<sup>18</sup> autism spectrum,<sup>17</sup> and  
15  
16 neurodevelopmental impairment.<sup>20</sup> Interestingly, in the present study, the mean value of  
17  
18 height (155cm) in women with VLBW is close to the average value of the Japanese  
19  
20 female population (158cm), whereas men with VLBW (164cm) were found to be  
21  
22 shorter compared to the Japanese male population (171cm) (average height data of  
23  
24 Japanese population were drawn from the report by the Ministry of Education, Culture,  
25  
26 Sports, Science, and Technology in Japan). In a previous study, young adults who had  
27  
28 been born SGA were shorter and had higher glucose levels than those with a normal  
29  
30 birth weight.<sup>22</sup> Reduced final height might be long term consequences of intrauterine  
31  
32 retardation, which would also influence glucose regulation. Further investigation is  
33  
34 needed to clarify whether the influence of VLBW on physical growth is more  
35  
36 remarkable in male than female infants, and elucidate the relationship between physical  
37  
38 growth and glucose regulation.  
39  
40  
41  
42  
43  
44  
45  
46  
47  
48  
49  
50  
51  
52  
53  
54

55 Previous studies have shown that SGA itself is associated with glucose intolerance.<sup>23</sup>

56  
57  
58 In our study, SGA was not significantly associated with glucose intolerance in total  
59  
60

1  
2  
3  
4  
5  
6  
7 subjects, but was associated in male subjects. The influence of SGA on glucose  
8  
9  
10 regulation in young adults with VLBW might be stronger in male than females. It is  
11  
12 possible that this gender difference in glucose regulation is owing to the gender  
13  
14 difference in the strength of SGA effect.  
15  
16  
17  
18  
19  
20  
21

### 22 **Strength and weakness of the study**

23  
24  
25 The major strength of our study is a well-characterized cohort of subjects with VLBW,  
26  
27 who are quite rare in the general population (approximately 0.5%). Our study includes a  
28  
29 relatively large number of young adults with VLBW, and the individuals with profound  
30  
31 complications were carefully excluded in the recruiting process. By this cautious  
32  
33 selection, 111 participants would represent the VLBW population spending common life  
34  
35 without disability in the general public, and it should make the findings of the study  
36  
37 more meaningful. In addition, as participants in the cohort were all Japanese, their racial  
38  
39 homogeneity made considerations of ethnic differences in glucose regulation  
40  
41 unnecessary. To date, the glucose regulation of Asian young adults with VLBW has  
42  
43 been uncertain. Our findings would be useful to clinicians and researchers, and  
44  
45 stimulate future large-scale prospective cohort studies in Asian population.  
46  
47  
48  
49  
50  
51  
52  
53  
54  
55  
56  
57  
58

59 In the present study, we could not obtain information regarding the growth rate in  
60

1  
2  
3  
4  
5  
6  
7 childhood of all participants. This is a major limitation of the study. The postnatal  
8  
9  
10 growth pattern in infancy has been shown to be associated with later glucose  
11  
12 intolerance.<sup>24-27</sup> The clinical records of participants were written 20 to 30 years ago, and  
13  
14  
15 some of them were no longer preserved. Additionally, maternal factors such as advanced  
16  
17  
18 age, smoking, gestational diabetes, and perinatal complications were not available in the  
19  
20  
21 present study. These factors might have affected fetal malnutrition and subsequently led  
22  
23  
24 to VLBW.  
25  
26  
27  
28  
29  
30

### 31 **Future Perspective**

32  
33  
34 As neonatal intensive care is making steady progress, an increasing number of young  
35  
36  
37 adults with VLBW worldwide will face a greater variety of health problems. Clinician  
38  
39  
40 should be aware of the risk of glucose intolerance in young adults with VLBW, and  
41  
42  
43 follow up them for a longer period of time. It may be worthwhile for them to check their  
44  
45  
46 glucose metabolism with OGTT in their twenties or thirties, which would lead to early  
47  
48  
49 intervention in their lifestyle and subsequently contribute to prevention of type 2  
50  
51  
52 diabetes and cardiovascular disease.<sup>5-7</sup> In the present study, we have found that male  
53  
54  
55 gender was a significant independent risk factor of glucose intolerance in young adults  
56  
57  
58 with VLBW. In addition to the gender difference, future studies are required to focus on  
59  
60

1  
2  
3  
4  
5  
6  
7 the factors affecting the glucose metabolism in VLBW infants.  
8  
9

10  
11  
12 **Acknowledgment:** The authors thank all the participants who participated in this study;  
13  
14  
15  
16 the pediatricians who have treated the participants in their neonatal periods; the  
17  
18  
19 colleagues who made a great contribution to the study as clinical research coordinators:  
20  
21  
22 Masahiro Asano, Kikuko Tejima, Emiko Morita, Mari Suzuki, Kaoru Kikuchi, and  
23  
24  
25 Chieko Suzuki; the colleagues who played vital roles by excellent technical assistance:  
26  
27  
28 Hiromi Kajima, Takako Akiyama, and Masato Shouji; and Keisuke Ishii and Gregory  
29  
30  
31 O'Dowd for encouraging advice on the present study.  
32  
33  
34  
35  
36

37  
38 **Contributors:** RS and HW drafted the paper. RS conceived the study. RS and KS  
39  
40  
41 developed the idea. RS, HW, KS, SO, RG, MM, and HN were involved in study design.  
42  
43  
44 RS and KS participated in data acquisition. RS, HW, HM, EI, MT, and MM were  
45  
46  
47 engaged in data analysis.  
48  
49

50  
51 **Funding:** This study was partly supported by grants from the Japan Society for the  
52  
53  
54 Promotion of Science (21390180) and from the Ministry of Health, Labour and Welfare  
55  
56  
57 in Japan (H23-Cardiovascular disease and Diabetes-011).  
58

59 **Competing Interest:** None.  
60

1  
2  
3  
4  
5  
6  
7 **Ethical approval:** The study was approved by the ethical committee of Seirei  
8  
9  
10 Hamamatsu General Hospital. All participants provided written informed consent to  
11  
12 participate in the study.  
13  
14

15  
16 **Data sharing statement:** Data will not be publically accessible. However, interested  
17  
18 individuals may contact the authors.  
19  
20  
21  
22  
23  
24  
25  
26  
27  
28  
29  
30  
31  
32  
33  
34  
35  
36  
37  
38  
39  
40  
41  
42  
43  
44  
45  
46  
47  
48  
49  
50  
51  
52  
53  
54  
55  
56  
57  
58  
59  
60

## REFERENCES

1. Field DJ, Dorling JS, Manktelow BN, Draper ES. Survival of extremely premature babies in a geographically defined population: prospective cohort study of 1994-9 compared with 2000-5. *BMJ* 2008;336(7655):1221-3.
2. Barker DJ, Gluckman PD, Godfrey KM, Harding JE, Owens JA, Robinson JS. Fetal nutrition and cardiovascular disease in adult life. *Lancet* 1993;341(8850):938-41.
3. Kaijser M, Bonamy AK, Akre O, Cnattingius S, Granath F, Norman M, et al. Perinatal risk factors for diabetes in later life. *Diabetes* 2009;58(3):523-6.
4. Whincup PH, Kaye SJ, Owen CG, Huxley R, Cook DG, Anazawa S, et al. Birth weight and risk of type 2 diabetes: a systematic review. *JAMA* 2008;300(24):2886-97.
5. Knowler WC, Barrett-Connor E, Fowler SE, Hamman RF, Lachin JM, Walker EA, et al. Reduction in the incidence of type 2 diabetes with lifestyle intervention or metformin. *N Engl J Med* 2002;346(6):393-403.
6. Eriksson KF, Lindgarde F. Prevention of type 2 (non-insulin-dependent) diabetes mellitus by diet and physical exercise. The 6-year Malmo feasibility study. *Diabetologia* 1991;34(12):891-8.
7. Tuomilehto J, Lindstrom J, Eriksson JG, Valle TT, Hamalainen H, Ilanne-Parikka P, et al. Prevention of type 2 diabetes mellitus by changes in lifestyle among subjects with impaired glucose tolerance. *N Engl J Med* 2001;344(18):1343-50.
8. Hovi P, Andersson S, Eriksson JG, Jarvenpaa AL, Strang-Karlsson S, Makitie O, et al. Glucose regulation in young adults with very low birth weight. *N Engl J Med* 2007;356(20):2053-63.
9. Abdul-Ghani MA, Abdul-Ghani T, Ali N, Defronzo RA. One-hour plasma glucose concentration and the metabolic syndrome identify subjects at high risk for future type 2 diabetes. *Diabetes Care* 2008;31(8):1650-5.
10. Succurro E, Marini MA, Arturi F, Grembiale A, Lugara M, Andreozzi F, et al. Elevated one-hour post-load plasma glucose levels identifies subjects with normal glucose tolerance but early carotid atherosclerosis. *Atherosclerosis* 2009;207(1):245-9.
11. Zammitt NN, Frier BM. Hypoglycemia in type 2 diabetes: pathophysiology, frequency, and effects of different treatment modalities. *Diabetes Care* 2005;28(12):2948-61.
12. Matthews DR, Hosker JP, Rudenski AS, Naylor BA, Treacher DF, Turner RC.

- 1  
2  
3  
4  
5  
6 Homeostasis model assessment: insulin resistance and beta-cell function from  
7 fasting plasma glucose and insulin concentrations in man. *Diabetologia*  
8 1985;28(7):412-9.
- 10  
11 13. Willemsen RH, Leunissen RW, Stijnen T, Hokken-Koelega AC. Prematurity is not  
12 associated with reduced insulin sensitivity in adulthood. *J Clin Endocrinol*  
13 *Metab* 2009;94(5):1695-700.
- 14  
15 14. Faerch K, Borch-Johnsen K, Vaag A, Jorgensen T, Witte DR. Sex differences in  
16 glucose levels: a consequence of physiology or methodological convenience?  
17 The Inter99 study. *Diabetologia* 2010;53(5):858-65.
- 18  
19 15. Sicree RA, Zimmet PZ, Dunstan DW, Cameron AJ, Welborn TA, Shaw JE.  
20 Differences in height explain gender differences in the response to the oral  
21 glucose tolerance test- the AusDiab study. *Diabet Med* 2008;25(3):296-302.
- 22  
23 16. Henderson-Smart DJ, Hutchinson JL, Donoghue DA, Evans NJ, Simpson JM,  
24 Wright I. Prenatal predictors of chronic lung disease in very preterm infants.  
25 *Arch Dis Child Fetal Neonatal Ed* 2006;91(1):F40-5.
- 26  
27 17. Johnson S, Hollis C, Kochhar P, Hennessy E, Wolke D, Marlow N. Autism spectrum  
28 disorders in extremely preterm children. *J Pediatr* 2010;156(4):525-31 e2.
- 29  
30 18. Mohamed MA, Aly H. Male gender is associated with intraventricular hemorrhage.  
31 *Pediatrics* 2010;125(2):e333-9.
- 32  
33 19. Morse SB, Wu SS, Ma C, Ariet M, Resnick M, Roth J. Racial and gender  
34 differences in the viability of extremely low birth weight infants: a  
35 population-based study. *Pediatrics* 2006;117(1):e106-12.
- 36  
37 20. Spinillo A, Montanari L, Gardella B, Roccio M, Stronati M, Fazzi E. Infant sex,  
38 obstetric risk factors, and 2-year neurodevelopmental outcome among preterm  
39 infants. *Dev Med Child Neurol* 2009;51(7):518-25.
- 40  
41 21. Tyson JE, Parikh NA, Langer J, Green C, Higgins RD. Intensive care for extreme  
42 prematurity--moving beyond gestational age. *N Engl J Med*  
43 2008;358(16):1672-81.
- 44  
45 22. Leger J, Levy-Marchal C, Bloch J, Pinet A, Chevenne D, Porquet D, et al. Reduced  
46 final height and indications for insulin resistance in 20 year olds born small for  
47 gestational age: regional cohort study. *BMJ* 1997;315(7104):341-7.
- 48  
49 23. Saenger P, Czernichow P, Hughes I, Reiter EO. Small for gestational age: short  
50 stature and beyond. *Endocr Rev* 2007;28(2):219-51.
- 51  
52 24. Crowther NJ, Cameron N, Trusler J, Toman M, Norris SA, Gray IP. Influence of  
53 catch-up growth on glucose tolerance and beta-cell function in 7-year-old  
54 children: results from the birth to twenty study. *Pediatrics*  
55  
56  
57  
58  
59  
60

- 1  
2  
3  
4  
5  
6 2008;121(6):e1715-22.
- 7  
8 25. Eriksson JG, Osmond C, Kajantie E, Forsen TJ, Barker DJ. Patterns of growth  
9 among children who later develop type 2 diabetes or its risk factors.  
10 *Diabetologia* 2006;49(12):2853-8.  
11
- 12 26. Finken MJ, Keijzer-Veen MG, Dekker FW, Frolich M, Hille ET, Romijn JA, et al.  
13 Preterm birth and later insulin resistance: effects of birth weight and postnatal  
14 growth in a population based longitudinal study from birth into adult life.  
15 *Diabetologia* 2006;49(3):478-85.  
16
- 17 27. Leunissen RW, Kerkhof GF, Stijnen T, Hokken-Koelega A. Timing and tempo of  
18 first-year rapid growth in relation to cardiovascular and metabolic risk profile in  
19 early adulthood. *JAMA* 2009;301(21):2234-42.  
20  
21  
22  
23  
24  
25  
26  
27  
28  
29  
30  
31  
32  
33  
34  
35  
36  
37  
38  
39  
40  
41  
42  
43  
44  
45  
46  
47  
48  
49  
50  
51  
52  
53  
54  
55  
56  
57  
58  
59  
60



**Table 1. Clinical characteristics of young adults with very low birth weight (VLBW) at birth and at study assessment**

|                                     | Total (n=111) | Men (n=42)   | Women (n=69) |
|-------------------------------------|---------------|--------------|--------------|
| <b>At birth</b>                     |               |              |              |
| Gestational Age (wk)                | 29.7 (3.1)    | 29.2 (3.1)   | 30.0 (3.2)   |
| Weight (g)                          | 1152 (235)    | 1116 (233)   | 1174 (235)   |
| ELBW                                | 33 (29.7)     | 16 (38.1)    | 17 (24.6)    |
| SGA*                                | 39 (35.1)     | 14 (33.3)    | 25 (36.2)    |
| Birth from multiple pregnancy       | 18 (16.2)     | 9 (21.4)     | 9 (13.0)     |
| <b>At study assessment</b>          |               |              |              |
| Age (yr)                            | 24.8 (3.0)    | 24.7 (3.4)   | 24.9 (2.9)   |
| Family history of diabetes          | 22 (19.8)     | 7 (16.7)     | 15 (21.7)    |
| Height ( m)                         | 1.58 (0.07)   | 1.64 (0.06)  | 1.55 (0.06)  |
| Body Weight ( kg)                   | 52.3 (10.1)   | 54.9 (8.8)   | 50.7 (10.5)  |
| BMI (kg/m <sup>2</sup> )            | 20.9 (3.8)    | 20.5 (2.9)   | 21.1 (4.2)   |
| Blood pressure (mmHg)               |               |              |              |
| Systolic                            | 118 (16)      | 121 (17)     | 116 (14)     |
| Diastolic                           | 70 (11)       | 69 (12)      | 70 (10)      |
| Cholesterol (mg/dl)                 |               |              |              |
| Total                               | 184.8 (31.3)  | 192.5 (38.0) | 180.1 (25.7) |
| Low-density lipoprotein             | 104.3 (28.4)  | 112.1 (35.5) | 99.5 (22)    |
| High- density lipoprotein           | 65.7 (13.3)   | 64.1 (13.9)  | 66.6 (13.0)  |
| Triglycerides (mg/dl)               | 81.8 (72.2)   | 96.2 (106.7) | 73.0 (36.9)  |
| Renal function                      |               |              |              |
| Creatinine (mg/dl)                  | 0.66 (0.13)   | 0.79 (0.11)  | 0.58 (0.81)  |
| eGFR (ml/min/1.73 m <sup>2</sup> )† | 104.6 (18.4)  | 103.0 (17.7) | 105.6 (18.9) |

ELBW=Extremely low birth weight (<1000g); SGA=Small for gestational age; BMI=body mass index; eGFR=estimated glomerular filtration rate.

Data are expressed as mean (SD) or number (%).

\* Determined by a birth weight below the 10th percentile for gestational age according to standards defined by a study group of the Health Ministry in Japan.

† Calculated according to the Modification of Diet in Renal Disease (MDRD) study equation.

**Table 2. Correlated factors for glucose intolerance\* in young adults with very low birth weight (VLBW) assessed by logistic regression analyses**

| Variable                           | Odds Ratio | 95% CI      | P-value |
|------------------------------------|------------|-------------|---------|
| <b>Gender (Male)</b>               | 3.34       | 1.08 - 10.3 | 0.036   |
| <b>Factors at birth</b>            |            |             |         |
| Gestational Age (wk)               | 0.77       | 0.53 - 1.12 | 0.165   |
| Weight (g)                         | 1.00       | 1.00 - 1.01 | 0.085   |
| SGA                                | 2.56       | 0.37 - 17.5 | 0.340   |
| <b>Factors at study assessment</b> |            |             |         |
| Family history of diabetes         | 1.92       | 0.49 - 7.57 | 0.353   |
| BMI (kg/m <sup>2</sup> )           | 1.29       | 1.11 - 1.49 | 0.001   |

SGA=Small for gestational age; BMI=body mass index.

\*Glucose intolerance includes Diabetes, IGT (impaired glucose tolerance), IFG (impaired fasting glycaemia), and Non-diabetes/IGT/IFG with elevated 1-hour glucose levels (> 8.6mmol/l).

**Table 3. Gender differences in glucose regulation in young adults with very low birth weight (VLBW)**

|                                                           | Men (n=42)           | Women (n=69)          | P-value |
|-----------------------------------------------------------|----------------------|-----------------------|---------|
| Glucose intolerance                                       | 11 (26.2)            | 10 (14.5)             | 0.13    |
| Diabetes                                                  | 0                    | 1                     |         |
| IGT                                                       | 2                    | 4                     |         |
| IFG                                                       | 1                    | 0                     |         |
| Non-diabetes/IGT/IFG with elevated 1-hour glucose levels* | 8                    | 5                     |         |
| HbA1c (%)                                                 | 5.39 (5.31 - 5.47)   | 5.39 (5.31 - 5.47)    | 0.64    |
| HOMA- $\beta$                                             | 72.5 (59.0 - 86.0)   | 103 (87.2 - 119.6)    | 0.001   |
| HOMA-IR                                                   | 1.4 (1.14 - 1.69)    | 1.6 (1.29 - 1.90)     | 0.48    |
| Variable during OGTT                                      |                      |                       |         |
| Insulinogenic Index                                       | 1.1 (0.64 - 1.60)    | 1.4 (1.18 - 1.71)     | 0.002   |
| Glucose <sub>AUC</sub> (mmol/l $\times$ hr)               | 18.8 (17.9 - 19.7)   | 18.2 (17.3 - 19.0)    | 0.089   |
| Insulin <sub>AUC</sub> ( $\mu$ U/ml $\times$ hr)          | 135.3 (98.7 - 171.9) | 145.1 (121.7 - 168.6) | 0.052   |
| Reactive hypoglycemia                                     | 17 (40)              | 17 (25)               | 0.079   |

IGT=impaired glucose tolerance; IFG=impaired fasting glycaemia; HOMA- $\beta$ =homeostasis model of assessment for beta cell; HOMA-IR=homeostasis model of assessment for insulin resistance.

Data are expressed as mean (95% CI) or number (%).

\*Defined as 1-hour glucose levels > 8.6mmol/l.

## Figure Legends

### Figure 1. Flow of participants through the study

(There is no figure legend in Figure 1.)

### Figure 2. The gender differences of glucose and insulin levels during OGTT in young adults with very low birth weight (VLBW)

Male subjects had significantly higher levels of glucose and lower levels of insulin during OGTT than female subjects ( $p < 0.001$  for glucose and  $p = 0.005$  for insulin by repeated measure ANOVA).

#### The numerical data of Figure 2.

##### Male (n=42)

|                        | 0 (min)           | 30               | 60               | 90               | 120              | 180              |
|------------------------|-------------------|------------------|------------------|------------------|------------------|------------------|
| Plasma glucose (mg/dl) | 5.208<br>(0.3695) | 8.579<br>(1.272) | 7.167<br>(1.824) | 6.262<br>(1.523) | 5.749<br>(1.102) | 4.360<br>(1.205) |
| Insulin (microU/ml)    | 6.057<br>(3.519)  | 64.95<br>(64.53) | 53.70<br>(47.86) | 53.27<br>(49.61) | 49.84<br>(50.66) | 20.94<br>(24.37) |

##### Female (n=69)

|                        | 0 (min)           | 30               | 60               | 90               | 120              | 180              |
|------------------------|-------------------|------------------|------------------|------------------|------------------|------------------|
| Plasma glucose (mg/dl) | 4.930<br>(0.4266) | 7.529<br>(1.460) | 6.596<br>(1.946) | 6.178<br>(1.541) | 5.829<br>(1.487) | 4.881<br>(1.121) |
| Insulin (microU/ml)    | 7.090<br>(5.107)  | 66.22<br>(42.62) | 57.09<br>(51.97) | 54.95<br>(44.39) | 51.11<br>(39.85) | 31.82<br>(28.03) |

Data are expressed as mean (SD).

**Figure 1. Flow of Participants through the study**

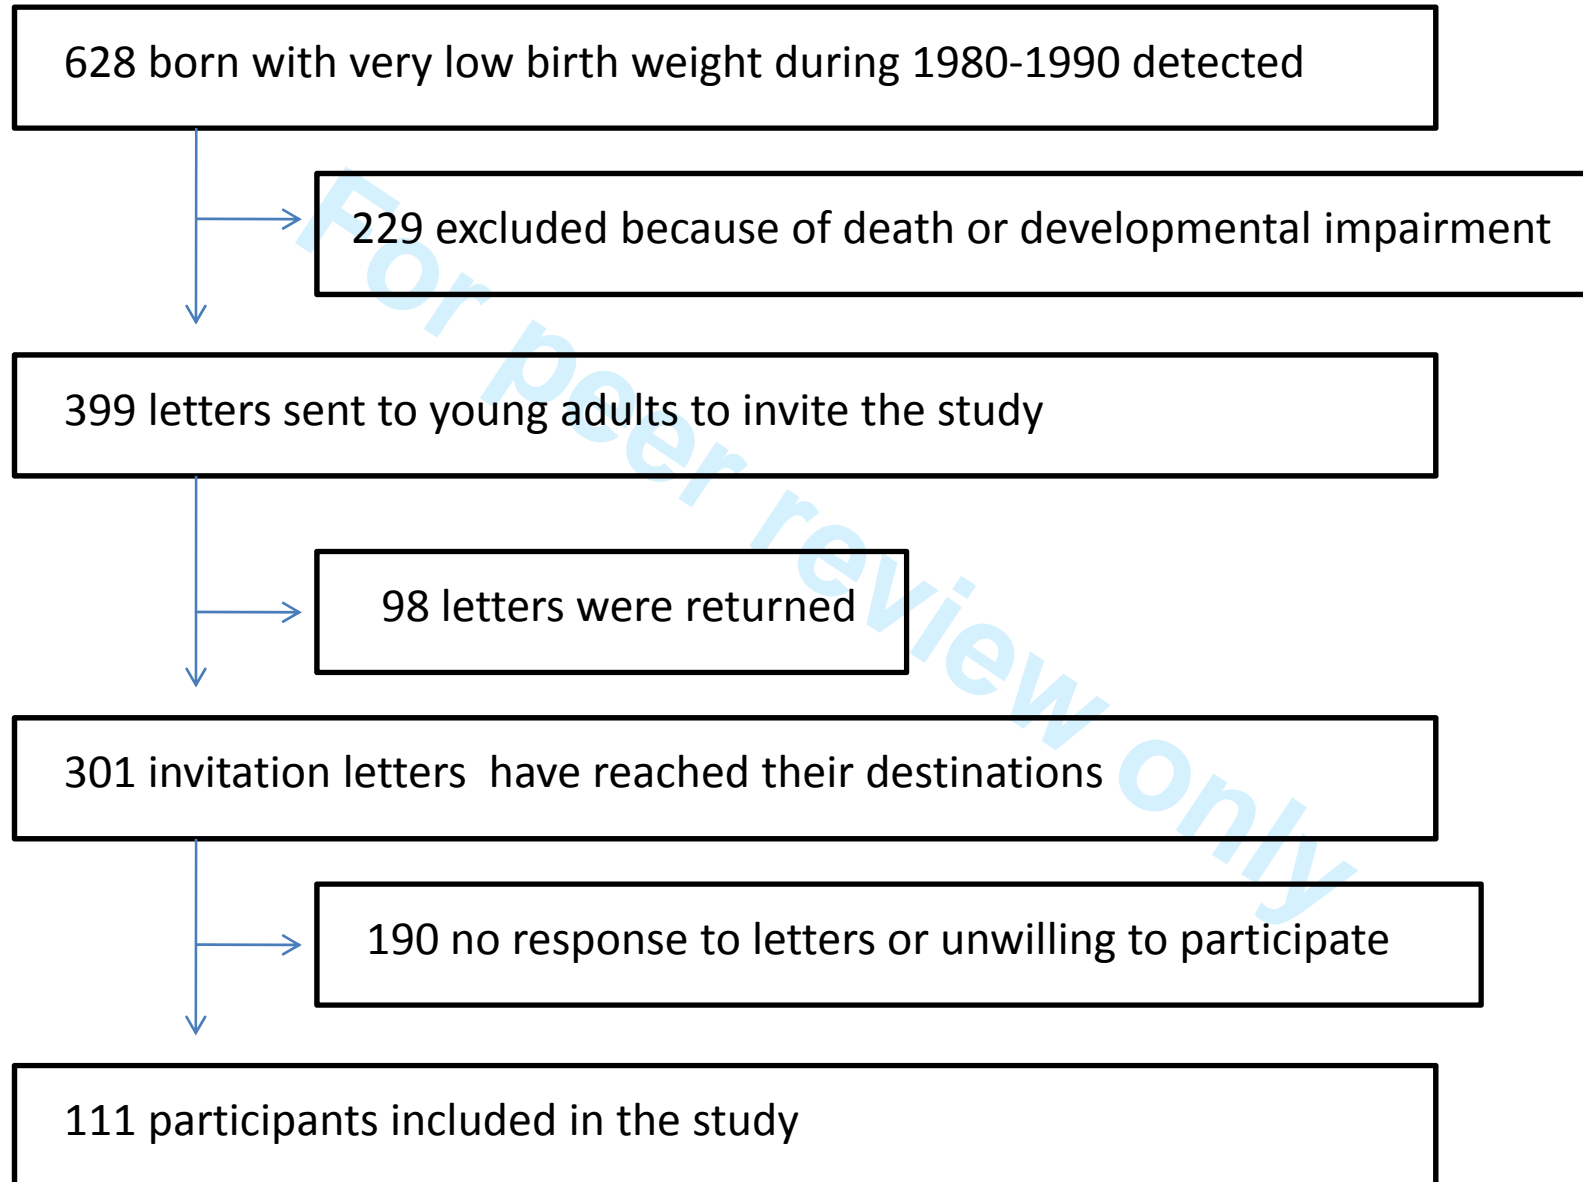

**Figure 2. The gender differences of glucose and insulin levels during OGTT in young adults with very low birth weight (VLBW)**

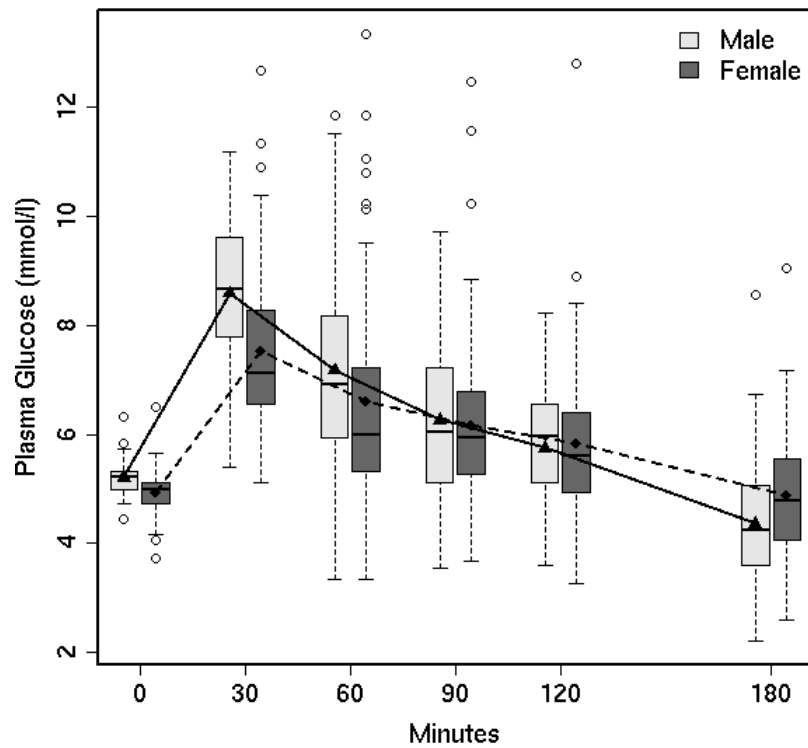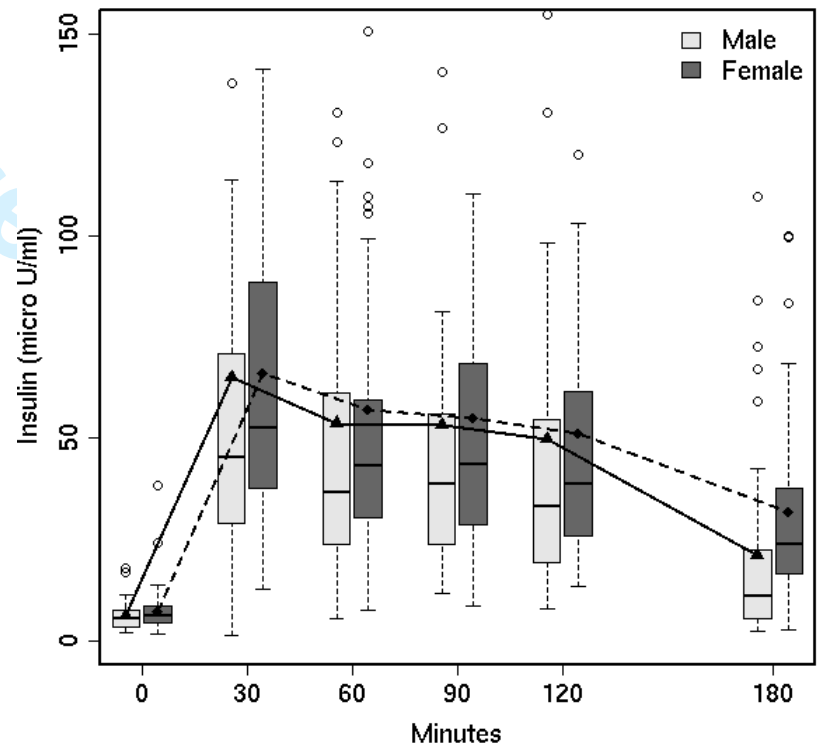

STROBE 2007 (v4) Statement—Checklist of items that should be included in reports of *cross-sectional studies*

| Section/Topic                | Item # | Recommendation                                                                                                                                                                       | Reported on page # |
|------------------------------|--------|--------------------------------------------------------------------------------------------------------------------------------------------------------------------------------------|--------------------|
| Title and abstract           | 1      | (a) Indicate the study's design with a commonly used term in the title or the abstract                                                                                               | 3                  |
|                              |        | (b) Provide in the abstract an informative and balanced summary of what was done and what was found                                                                                  | 3                  |
| <b>Introduction</b>          |        |                                                                                                                                                                                      |                    |
| Background/rationale         | 2      | Explain the scientific background and rationale for the investigation being reported                                                                                                 | 7                  |
| Objectives                   | 3      | State specific objectives, including any prespecified hypotheses                                                                                                                     | 7                  |
| <b>Methods</b>               |        |                                                                                                                                                                                      |                    |
| Study design                 | 4      | Present key elements of study design early in the paper                                                                                                                              | 8                  |
| Setting                      | 5      | Describe the setting, locations, and relevant dates, including periods of recruitment, exposure, follow-up, and data collection                                                      | 8                  |
| Participants                 | 6      | (a) Give the eligibility criteria, and the sources and methods of selection of participants                                                                                          | 8                  |
| Variables                    | 7      | Clearly define all outcomes, exposures, predictors, potential confounders, and effect modifiers. Give diagnostic criteria, if applicable                                             | 9-10               |
| Data sources/<br>measurement | 8*     | For each variable of interest, give sources of data and details of methods of assessment (measurement). Describe comparability of assessment methods if there is more than one group | n/a                |
| Bias                         | 9      | Describe any efforts to address potential sources of bias                                                                                                                            | 8                  |
| Study size                   | 10     | Explain how the study size was arrived at                                                                                                                                            | 8                  |
| Quantitative variables       | 11     | Explain how quantitative variables were handled in the analyses. If applicable, describe which groupings were chosen and why                                                         | 10                 |
| Statistical methods          | 12     | (a) Describe all statistical methods, including those used to control for confounding                                                                                                | 10-11, 13          |
|                              |        | (b) Describe any methods used to examine subgroups and interactions                                                                                                                  | 13                 |
|                              |        | (c) Explain how missing data were addressed                                                                                                                                          | n/a                |
|                              |        | (d) If applicable, describe analytical methods taking account of sampling strategy                                                                                                   | n/a                |
|                              |        | (e) Describe any sensitivity analyses                                                                                                                                                | n/a                |
| <b>Results</b>               |        |                                                                                                                                                                                      |                    |

|                          |     |                                                                                                                                                                                                              |          |
|--------------------------|-----|--------------------------------------------------------------------------------------------------------------------------------------------------------------------------------------------------------------|----------|
| Participants             | 13* | (a) Report numbers of individuals at each stage of study—eg numbers potentially eligible, examined for eligibility, confirmed eligible, included in the study, completing follow-up, and analysed            | 8        |
|                          |     | (b) Give reasons for non-participation at each stage                                                                                                                                                         | 8        |
|                          |     | (c) Consider use of a flow diagram                                                                                                                                                                           | Figure 1 |
| Descriptive data         | 14* | (a) Give characteristics of study participants (eg demographic, clinical, social) and information on exposures and potential confounders                                                                     | Table 1  |
|                          |     | (b) Indicate number of participants with missing data for each variable of interest                                                                                                                          | n/a      |
| Outcome data             | 15* | Report numbers of outcome events or summary measures                                                                                                                                                         | n/a      |
| Main results             | 16  | (a) Give unadjusted estimates and, if applicable, confounder-adjusted estimates and their precision (eg, 95% confidence interval). Make clear which confounders were adjusted for and why they were included | 12-13    |
|                          |     | (b) Report category boundaries when continuous variables were categorized                                                                                                                                    | n/a      |
|                          |     | (c) If relevant, consider translating estimates of relative risk into absolute risk for a meaningful time period                                                                                             | n/a      |
| Other analyses           | 17  | Report other analyses done—eg analyses of subgroups and interactions, and sensitivity analyses                                                                                                               | 13       |
| <b>Discussion</b>        |     |                                                                                                                                                                                                              |          |
| Key results              | 18  | Summarise key results with reference to study objectives                                                                                                                                                     | 13-14    |
| Limitations              | 19  | Discuss limitations of the study, taking into account sources of potential bias or imprecision. Discuss both direction and magnitude of any potential bias                                                   | 16       |
| Interpretation           | 20  | Give a cautious overall interpretation of results considering objectives, limitations, multiplicity of analyses, results from similar studies, and other relevant evidence                                   | 15-16    |
| Generalisability         | 21  | Discuss the generalisability (external validity) of the study results                                                                                                                                        | 16       |
| <b>Other information</b> |     |                                                                                                                                                                                                              |          |
| Funding                  | 22  | Give the source of funding and the role of the funders for the present study and, if applicable, for the original study on which the present article is based                                                | 18       |

\*Give information separately for cases and controls in case-control studies and, if applicable, for exposed and unexposed groups in cohort and cross-sectional studies.

**Note:** An Explanation and Elaboration article discusses each checklist item and gives methodological background and published examples of transparent reporting. The STROBE checklist is best used in conjunction with this article (freely available on the Web sites of PLoS Medicine at <http://www.plosmedicine.org/>, Annals of Internal Medicine at <http://www.annals.org/>, and Epidemiology at <http://www.epidem.com/>). Information on the STROBE Initiative is available at [www.strobe-statement.org](http://www.strobe-statement.org).



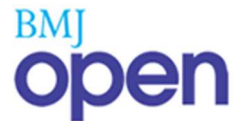

**A cross-sectional study of glucose regulation in young adults with very low birth weight: impact of male gender on hyperglycemia**

|                                 |                                                                                                                                                                                                                                                                                                                                                                                                                                                                                                                                                                                                                                                                                                                                                                                                                                                                                                                                                                                                                                                                                                                                                                         |
|---------------------------------|-------------------------------------------------------------------------------------------------------------------------------------------------------------------------------------------------------------------------------------------------------------------------------------------------------------------------------------------------------------------------------------------------------------------------------------------------------------------------------------------------------------------------------------------------------------------------------------------------------------------------------------------------------------------------------------------------------------------------------------------------------------------------------------------------------------------------------------------------------------------------------------------------------------------------------------------------------------------------------------------------------------------------------------------------------------------------------------------------------------------------------------------------------------------------|
| Journal:                        | <i>BMJ Open</i>                                                                                                                                                                                                                                                                                                                                                                                                                                                                                                                                                                                                                                                                                                                                                                                                                                                                                                                                                                                                                                                                                                                                                         |
| Manuscript ID:                  | bmjopen-2011-000327.R1                                                                                                                                                                                                                                                                                                                                                                                                                                                                                                                                                                                                                                                                                                                                                                                                                                                                                                                                                                                                                                                                                                                                                  |
| Article Type:                   | Research                                                                                                                                                                                                                                                                                                                                                                                                                                                                                                                                                                                                                                                                                                                                                                                                                                                                                                                                                                                                                                                                                                                                                                |
| Date Submitted by the Author:   | 24-Nov-2011                                                                                                                                                                                                                                                                                                                                                                                                                                                                                                                                                                                                                                                                                                                                                                                                                                                                                                                                                                                                                                                                                                                                                             |
| Complete List of Authors:       | Sato, Ryosuke; Hamamatsu University School of Medicine, Department of Endocrinology and Metabolism, Division of Internal Medicine II; Seirei Hamamatsu General Hospital, Department of Endocrinology and Metabolism<br>Watanabe, Hiroshi; Hamamatsu University School of Medicine, Department of Clinical Pharmacology and Therapeutics<br>Shirai, Kenji; Seirei Hamamatsu General Hospital, Department of Neonatology<br>Ohki, Shigeru; Seirei Hamamatsu General Hospital, Department of Neonatology<br>Genma, Rieko; Seirei Hamamatsu General Hospital, Department of Endocrinology and Metabolism<br>Morita, Hiroshi; Hamamatsu University School of Medicine, Department of Endocrinology and Metabolism, Division of Internal Medicine II<br>Inoue, Eisuke; Kitasato University, Department of Clinical Medicine (Biostatics)<br>Takeuchi, Masahiro; Kitasato University, Department of Clinical Medicine (Biostatics)<br>Maekawa, Masato; Hamamatsu University School of Medicine, Department of Laboratory Medicine<br>Nakamura, Hirotohi; Hamamatsu University School of Medicine, Department of Endocrinology and Metabolism, Division of Internal Medicine II |
| <b>Primary Subject Heading</b>: | Diabetes and endocrinology                                                                                                                                                                                                                                                                                                                                                                                                                                                                                                                                                                                                                                                                                                                                                                                                                                                                                                                                                                                                                                                                                                                                              |
| Secondary Subject Heading:      | Paediatrics, Cardiovascular medicine                                                                                                                                                                                                                                                                                                                                                                                                                                                                                                                                                                                                                                                                                                                                                                                                                                                                                                                                                                                                                                                                                                                                    |
| Keywords:                       | Diabetes Mellitus, Very low birth weight (VLBW), Small for gestational age (SGA), Gender difference, Oral glucose tolerance test (OGTT), hyperglycemia                                                                                                                                                                                                                                                                                                                                                                                                                                                                                                                                                                                                                                                                                                                                                                                                                                                                                                                                                                                                                  |
|                                 |                                                                                                                                                                                                                                                                                                                                                                                                                                                                                                                                                                                                                                                                                                                                                                                                                                                                                                                                                                                                                                                                                                                                                                         |

1  
2  
3  
4  
5  
6 **A cross-sectional study of glucose regulation in young adults with very**  
7  
8  
9 **low birth weight: impact of male gender on hyperglycemia**  
10  
11  
12  
13

14 Ryosuke Sato,<sup>1,2</sup> Hiroshi Watanabe,<sup>3</sup> Kenji Shirai,<sup>4</sup> Shigeru Ohki,<sup>4</sup> Rieko Genma,<sup>2</sup>  
15  
16

17 Hiroshi Morita,<sup>1</sup> Eisuke Inoue,<sup>5</sup> Masahiro Takeuchi,<sup>5</sup> Masato Maekawa,<sup>6</sup> Hirotoishi  
18  
19

20 Nakamura<sup>1</sup>  
21  
22  
23  
24  
25

26 **Address and Affiliations (position)**  
27

28 <sup>1</sup>Department of Endocrinology and Metabolism, Division of Internal Medicine II, Hamamatsu  
29 University School of Medicine, 1-20-1, Handayama, Higashi-ku, Hamamatsu, 431-3192, Japan.

30 Ryosuke Sato: Physician  
31

32 Hiroshi Morita: Physician  
33

34 Hirotoishi Nakamura: Professor  
35  
36

37 <sup>2</sup>Department of Endocrinology and Metabolism, Seirei Hamamatsu General Hospital, 2-12-12,  
38 Sumiyoshi, Naka-ku, Hamamatsu, 430-8558, Japan.

39 Ryosuke Sato: Physician  
40

41 Rieko Genma: Physician  
42  
43

44 <sup>3</sup>Department of Clinical Pharmacology and Therapeutics, Hamamatsu University School of  
45 Medicine, 1-20-1, Handayama, Higashi-ku, Hamamatsu, 431-3192, Japan.

46 Hiroshi Watanabe: Professor  
47  
48  
49

50 <sup>4</sup>Department of Neonatology, Seirei Hamamatsu General Hospital, 2-12-12, Sumiyoshi, Naka-ku,  
51 Hamamatsu, 430-8558, Japan.

52 Kenji Shirai: Neonatologist  
53

54 Shigeru Ohki: Neonatologist  
55  
56  
57  
58  
59  
60

<sup>5</sup>Department of Clinical Medicine (Biostatistics), Kitasato University, 5-9-1, Shirokane, Minato-ku, Tokyo, 108-8641, Japan.

Eisuke Inoue: Statistician

Masahiro Takeuchi: Professor

<sup>6</sup>Department of Laboratory Medicine, Hamamatsu University School of Medicine, 1-20-1, Handayama, Higashi-ku, Hamamatsu, 431-3192, Japan.

Masato Maekawa: Professor

**Correspondence:** Ryosuke Sato, MD, Department of Endocrinology and Metabolism,

Division of Internal Medicine II, Hamamatsu University School of Medicine, 1-20-1,

Handayama, Higashi-ku, Hamamatsu, 431-3192, Japan. Tel: +81-53-435-2385; Fax:

+81-53-435-2386; E-mail: ryos@hama-med.ac.jp

Word counts for the abstract: 298

Word counts for the manuscript: 2428

The number of Bibliography: 35

The number of figures: 2

The number of tables: 3

**Keywords:** diabetes mellitus, very low birth weight (VLBW), small for gestational age

(SGA), gender difference, oral glucose tolerance test (OGTT)

**ABSTRACT**

**Objectives:** To investigate glucose regulation in young adults with very low birth weight (VLBW; <1500g) in an Asian population.

**Design:** Cross-sectional, observational study.

**Setting:** A general hospital in Hamamatsu, Japan.

**Participants:** 111 young adults (42 men and 69 women; aged 19-30 years) born with VLBW between 1980 and 1990. Participants underwent standard 75-g oral glucose tolerance test (OGTT).

**Primary and secondary outcome measures:** The primary outcomes were glucose and insulin levels during OGTT, and risk factors for a category of hyperglycemia defined as follows: diabetes mellitus; impaired glucose tolerance (IGT); impaired fasting glycemia (IFG); and non-diabetes/IGT/IFG with elevated 1-hour glucose levels (>8.6 mmol/l). The secondary outcomes were the pancreatic beta cell function (insulinogenic index and homeostasis model of assessment for beta cell [HOMA- $\beta$ ]), and insulin resistance (homeostasis model of assessment for insulin resistance [HOMA-IR]).

**Results:** Of 111 young adults with VLBW, 21 subjects (19%) had hyperglycemia: 1 had type 2 diabetes; 6 had IGT; 1 had IFG; and 13 had non-diabetes/IGT/IFG with elevated 1-hour glucose levels. In logistic regression analysis, male gender was an independent

1  
2  
3  
4  
5  
6 risk factor associated with hyperglycemia (OR: 3.34; 95%CI: 1.08-10.3; p=0.036). Male  
7  
8  
9 subjects had significantly higher levels of glucose and lower levels of insulin during  
10  
11  
12 OGTT than female subjects (p<0.001 for glucose and p=0.005 for insulin by repeated  
13  
14  
15 measure ANOVA). Pancreatic beta cell function was lower in men (insulinogenic index:  
16  
17  
18 p=0.002; HOMA- $\beta$ : p=0.001), although no gender difference was found in insulin  
19  
20  
21 resistance (HOMA-IR: p=0.477). In male subjects, logistic regression analysis showed  
22  
23  
24 that small for gestational age (SGA) was an independent risk factor associated with  
25  
26  
27 hyperglycemia (OR: 33.3; 95%CI: 1.67-662.6; p=0.022).

28  
29 **Conclusions:** 19% of individuals with VLBW already had hyperglycemia in young  
30  
31  
32 adulthood, and male gender was a significant independent risk factor of hyperglycemia.  
33  
34  
35 In male young adults with VLBW, SGA was associated with hyperglycemia.  
36  
37  
38  
39  
40  
41  
42  
43  
44  
45  
46  
47  
48  
49  
50  
51  
52  
53  
54  
55  
56  
57  
58  
59  
60

## ARTICLE SUMMARY

### Article focus

- Neonatal intensive care has improved the survival rate for very low birth weight infants (VLBW; birth weight <1500g) in recent decades, and the first generation of VLBW infants have only recently reached young adulthood.
- Only a few studies have shown that VLBW (or preterm) is associated with glucose intolerance in Caucasian young adults, while glucose regulation in Asian young adults with VLBW is still uncertain.
- The present study investigated glucose regulation in young adults with VLBW in an Asian population, and determined the factors associated with hyperglycemia.

### Key messages

- Of 111 young adults with VLBW, 19% of individuals already had hyperglycemia (type 2 diabetes, IGT, IFG, and non-diabetes/IGT/IFG with elevated 1-hour glucose levels).
- Male gender was a significant independent risk factor of hyperglycemia in young adults with VLBW.
- Small for gestational age (SGA) was associated with hyperglycemia particularly in

1  
2  
3  
4  
5  
6 male young adults with VLBW.  
7  
8  
9

### 10 11 **Strengths and limitations of this study**

- 14 ■ This is the first study assessing the glucose regulation in young adults with VLBW  
15  
16 in an Asian population.  
17  
18
- 20 ■ This study does not provide information on postnatal growth patterns, which have  
21  
22 been shown to be associated with later hyperglycemia in previous studies.  
23  
24
- 26 ■ The study design with no control subjects makes it impossible to address the  
27  
28 delayed impact of VLBW itself on glucose regulation.  
29  
30  
31  
32  
33  
34  
35  
36  
37  
38  
39  
40  
41  
42  
43  
44  
45  
46  
47  
48  
49  
50  
51  
52  
53  
54  
55  
56  
57  
58  
59  
60

## INTRODUCTION

In recent decades, progression of neonatal intensive care has dramatically increased the survival rate of very low birth weight (VLBW; birth weight <1500g) infants worldwide.<sup>1</sup> A lot of them have grown up into young adult (now in their twenties or thirties). To date, epidemiological studies have shown an association between low birth weight and type 2 diabetes and cardiovascular disease in later life.<sup>2-4</sup> Fetal malnutrition in the gestational period, which prevents appropriate fetal growth in utero, is thought to provoke thrifty phenotype in premature babies. This phenotype is assumed to predispose them to subsequent metabolic disorders. For this reason, to foresee the later risk of type 2 diabetes is very crucial for VLBW infants, which would lead to prevention of type 2 diabetes by early intervention in their lifestyle.<sup>5-7</sup>

The first generation of VLBW infants have only recently reached young adulthood. A few studies have shown that VLBW (or preterm) is associated with glucose intolerance in young adulthood in Caucasian populations,<sup>8,9</sup> while the glucose regulation in Asian young adults with VLBW remains uncertain. To clarify the characteristics of glucose metabolism in young adults with VLBW in an Asian population, we investigated glucose regulation in 111 young adults with VLBW by performing detailed oral glucose tolerance test (OGTT), which is useful for evaluation of early signs of glucose



1  
2  
3  
4  
5  
6 intolerance.

## 7 8 9 10 11 12 **METHODS**

### 13 14 15 **Study Participants**

16  
17 The birth record database of Seirei Hamamatsu General Hospital (Hamamatsu, Japan)  
18 showed that 628 subjects were born with VLBW between 1980 and 1990, and were  
19 treated at a neonatal intensive care unit (**Figure 1**). VLBW infants were defined  
20 according to the World Health Organization (WHO) criteria: babies whose birth weight  
21 was less than 1500g. Out of the 628 subjects, 229 were excluded because of death  
22 (n=132) or severe neurodevelopmental impairment (n=97). To the remaining 399  
23 subjects, we sent letters which provided information regarding the study and requested  
24 their participation. Among the 399 letters, 98 were returned marked as address unknown  
25 (i.e. the remaining 301 letters were thought to reach their destinations). Consequently,  
26 111 subjects (aged 19-30 years) participated in the present study. All participants were  
27 Japanese. Small for gestational age (SGA) status was determined according to standards  
28 by a study group of the Health Ministry in Japan: a birth weight below the 10th  
29 percentile for gestational age.<sup>10</sup> The basal characteristics of participants at birth are  
30 summarized in **Table 1**.

31  
32  
33  
34  
35  
36  
37  
38  
39  
40  
41  
42  
43  
44  
45  
46  
47  
48  
49  
50  
51  
52  
53  
54  
55  
56  
57  
58  
59  
60

## Measurements

All participants underwent a standard 75-g OGTT after a ten-hour overnight fast.

Plasma glucose and serum insulin concentrations were examined at 0, 30, 60, 90, 120, and 180 minutes during OGTT. Fasting glucose levels and 2-hour glucose levels were used for diagnosing diabetes mellitus, impaired glucose tolerance (IGT), and impaired fasting glycaemia (IFG) according to the WHO criteria.<sup>11</sup> Since it has been shown that 1-hour plasma glucose concentration is associated with future risk of type 2 diabetes and atherosclerosis, 1-hour plasma glucose above 8.6 mmol/l (155 mg/dl) was included as a category of hyperglycemia.<sup>12 13</sup> Reactive hypoglycemia during OGTT was defined as the level of plasma glucose less than 3.8 mmol/l which causes the response of counter-regulatory hormone release.<sup>14</sup>

We measured plasma glucose and serum insulin levels during OGTT with an autoanalyzer JCA-BM2250 (JEOL, Tokyo, Japan). Plasma glucose was measured by means of hexokinase method. The concentration of serum insulin was measured with chemiluminescent enzyme immunoassay (CLIA). Fasting blood samples were also drawn for other measurements; total cholesterol, high-density lipoprotein (HDL) cholesterol, low-density lipoprotein (LDL) cholesterol, triglyceride, and creatinine.

1  
2  
3  
4  
5  
6 Glycated haemoglobin A1c (HbA1c) was measured with high-performance liquid  
7  
8  
9 chromatography (HPLC) method using an automated glycohaemoglobin analyzer  
10  
11  
12 HLC-723G8 (Tosoh Bioscience, Tokyo, Japan). The values for HbA1c were converted  
13  
14  
15 from Japanese Diabetes Society (JDS) values into National Glycohaemoglobin  
16  
17  
18 Standardization Program (NGSP) equivalent values. NGSP equivalent values were  
19  
20  
21 calculated with the formula:  $\text{HbA1c (\%)} = \text{JDS value (\%)} + 0.4$ .<sup>15</sup>  
22  
23  
24  
25

### 26 **Calculations and Statistical analysis**

27  
28  
29 Pancreatic beta cell function was evaluated by both insulinogenic index and  
30  
31  
32 homeostasis model of assessment for beta cell (HOMA- $\beta$ ).<sup>16</sup> Insulinogenic index, the  
33  
34  
35 index of early-phase insulin secretion, was calculated as the ratio of the increment in  
36  
37  
38 insulin concentration to the increment in glucose concentration ( $[\text{30-min insulin}$   
39  
40  
41  $(\mu\text{U/ml}) - \text{fasting insulin}] / [\text{30-min glucose (mmol/l)} - \text{fasting glucose}]$ ). HOMA- $\beta$  was  
42  
43  
44 calculated as follows:  $20 \times \text{fasting insulin } (\mu\text{U/ml}) / [\text{fasting glucose (mmol/l)} - 3.5]$ .  
45  
46  
47 Insulin resistance was estimated by homeostasis model of assessment for insulin  
48  
49  
50 resistance (HOMA-IR):  $\text{fasting insulin } (\mu\text{U/ml}) \times \text{fasting glucose (mmol/l)} / 22.5$ .<sup>16</sup> The  
51  
52  
53 total amounts of glucose and insulin levels during OGTT were assessed by calculating  
54  
55  
56 areas under the curve (AUC) with trapezoid rules. The estimated glomerular filtration  
57  
58  
59  
60

1  
2  
3  
4  
5  
6 rate (eGFR) was calculated according to the following formula, as recommended by the  
7  
8  
9 Japanese Society of Nephrology:  $eGFR \text{ (ml/min/1.73m}^2\text{)} = 194 \times \text{Cre}^{-1.094} \times \text{Age}^{-0.287} (\times$   
10  
11  
12  $0.739$  if the subject is a woman).<sup>17</sup>  
13

14  
15 Quantitative variables were expressed as mean and standard deviation (SD) or 95%  
16  
17 confidence interval (CI); categorical variables were presented as number and percentage.  
18  
19 Differences between groups were compared using the Student's t-test, the  
20  
21 Mann–Whitney U test, the Pearson's  $\chi^2$  test, or the repeated measure analysis of  
22  
23 variance (ANOVA) as appropriate. The data on insulin levels during OGTT were  
24  
25 logarithmically transformed before the repeated measure ANOVA. Logistic regression  
26  
27 analysis which included gender, family history of diabetes within the second degree,  
28  
29 BMI, gestational age, birth weight, and SGA/AGA (appropriate for gestational age) was  
30  
31 performed to estimate odds ratios for the category of hyperglycemia. For the further  
32  
33 investigation into glucose regulation, multiple linear regression analysis was conducted.  
34  
35 Gender, family history of diabetes, BMI, gestational age, birth weight, and SGA/AGA  
36  
37 were included in the model. The data on HOMA- $\beta$ , HOMA-IR, Insulinogenic Index,  
38  
39 and  $\text{Glucose}_{\text{AUC}}$  were logarithmically transformed before analysis to meet the  
40  
41 assumptions of normality. A p-value of less than 0.05 was defined as statistically  
42  
43 significant. All analyses were conducted using SAS software version 9.2 (SAS Institute,  
44  
45  
46  
47  
48  
49  
50  
51  
52  
53  
54  
55  
56  
57  
58  
59  
60

1  
2  
3  
4  
5  
6 Cary, North Carolina, USA) and the statistical software R version 2.12.2  
7  
8  
9 (http://www.r-project.org).  
10

## 11 12 13 14 15 **RESULTS**

16  
17 The basic characteristics of participants at study assessment are shown in **Table 1**. Of  
18  
19 111 young adults with VLBW, 21 subjects (19%) had hyperglycemia: one had type 2  
20  
21 diabetes; six had impaired glucose tolerance (IGT); one had impaired fasting glycaemia  
22  
23 (IFG); 13 non-diabetes/IGT/IFG subjects had elevated 1-hour glucose levels (>8.6  
24  
25 mmol/l). Hyperglycemia was more frequent in men than women (26.2 % for men vs  
26  
27 14.5 % for women). In the logistic regression analysis adjusted for family history of  
28  
29 diabetes within the second degree, BMI, gestational age, birth weight and SGA/AGA,  
30  
31 male gender was a statistically significant independent factor associated with  
32  
33 hyperglycemia (Odds ratio: 3.34; 95% CI: 1.08-10.3; p= 0.036). BMI at study  
34  
35 assessment was also associated with hyperglycemia (**Table 2**).  
36  
37  
38  
39  
40  
41  
42  
43  
44  
45  
46  
47  
48

### 49 **Gender difference**

50  
51 As male gender was a significant independent risk factor of hyperglycemia, we  
52  
53 evaluated the differences in glucose regulation between men and women in the sample  
54  
55  
56  
57  
58  
59  
60

1  
2  
3  
4  
5  
6 group. **Figure 2** shows the glucose and insulin response during OGTT in men and  
7  
8  
9 women. Male subjects had significantly higher levels of glucose during OGTT than  
10  
11 female subjects ( $p < 0.001$  by repeated measure ANOVA). In terms of insulin levels,  
12  
13 male subjects had lower levels of insulin during OGTT than female subjects ( $p = 0.005$   
14  
15 by repeated measure ANOVA). Glucose<sub>AUC</sub> during OGTT tended to be higher in male  
16  
17 subjects (**Table 3**). As for the function of insulin secretion, insulinogenic index and  
18  
19 HOMA- $\beta$  were significantly lower in men than in women. Insulin<sub>AUC</sub> also showed a  
20  
21 tendency to be lower in male subjects. Reactive hypoglycemia during OGTT tended to  
22  
23 be frequent in men. The differences in the mean values of HbA1c and HOMA-IR were  
24  
25 not statistically significant. There were no significant gender differences in gestational  
26  
27 age ( $p = 0.145$ ), birth weight ( $p = 0.168$ ), age at study assessment ( $p = 0.845$ ), BMI  
28  
29 ( $p = 0.879$ ), the proportion of SGA ( $p = 0.756$ ), and that of family history of diabetes  
30  
31 within the second degree ( $p = 0.516$ ). The variables for glucose metabolism in men and  
32  
33 women are summarized in **Table 3**.  
34  
35  
36  
37  
38  
39  
40  
41  
42  
43  
44  
45

46 We evaluated the associations between gender and the variables of glucose metabolism  
47  
48 by multiple linear regression analysis. Adjustments were made for family history of  
49  
50 diabetes within the second degree, BMI, gestational age, birth weight, and SGA/AGA.  
51  
52 In this analysis, male gender had inverse associations with HOMA- $\beta$  ( $\beta$ : -0.336; 95%  
53  
54  
55  
56  
57  
58  
59  
60

1  
2  
3  
4  
5  
6 CI: -0.509 to -0.163;  $p < 0.001$ ) and insulinogenic index ( $\beta$ : -0.195; 95% CI: -0.344 to  
7  
8  
9 -0.047;  $p=0.01$ ). Glucose<sub>AUC</sub> during OGTT tended to be positively associated with male  
10  
11  
12 gender ( $\beta$ : 0.056; 95% CI: -0.0047 to 0.116;  $p=0.071$ ).

13  
14  
15 In male subjects, after an adjustment for family history of diabetes, BMI, gestational  
16  
17  
18 age, and birth weight, the logistic regression analysis showed that SGA was a  
19  
20  
21 statistically significant independent factor associated with hyperglycemia (Odds ratio:  
22  
23  
24 33.3; 95% CI: 1.67-662.6;  $p=0.022$ ).

## 25 26 27 28 29 **DISCUSSION**

30  
31  
32 To the best of our knowledge, this is the first study assessing the glucose regulation in  
33  
34  
35 young adults with VLBW in an Asian population. Our study has indicated that 19% of  
36  
37  
38 young adults with VLBW already had hyperglycemia: type 2 diabetes; IGT; IFG; and  
39  
40  
41 non-diabetes/IGT/IFG with high 1-hour plasma glucose level. A report from the  
42  
43  
44 Japanese Ministry of Health, Welfare, and Labour in 2007 showed that of 204 general  
45  
46  
47 young adults (aged 20-29 years), 2 individuals (0.98%) had high levels of HbA1c (more  
48  
49  
50 than 6.0%; NGSP equivalent values),<sup>18</sup> while 3.6% of young adults with VLBW had the  
51  
52  
53 HbA1c values more than 6.0% in the present study. In a previous study, Hovi et al.  
54  
55  
56 reported that VLBW infants in young adulthood had higher indexes of glucose  
57  
58  
59  
60

1  
2  
3  
4  
5  
6 intolerance compared with term infants.<sup>9</sup> A recent epidemiological study has also shown  
7  
8  
9 that preterm birth is associated with an increased risk of diabetes in young adults.<sup>8</sup> On  
10  
11  
12 the other hand, a study in the Netherlands showed that preterm birth was not associated  
13  
14  
15 with reduced insulin sensitivity in young adulthood.<sup>19</sup> The findings of that study may be  
16  
17  
18 biased by the way of recruiting the control subjects born at term. Our findings would be  
19  
20  
21 in line with the standpoint of high prevalence of hyperglycemia in premature infants in  
22  
23  
24 young adulthood, although absence of control subjects presents a limitation of  
25  
26  
27 demonstrating the impact of VLBW itself on glucose regulation.

28  
29 We have also found that male subjects had higher glucose levels during OGTT than  
30  
31  
32 females. Previous studies in the general population showed that women had higher  
33  
34  
35 postload glucose levels than men, which were explained by differences in body size.<sup>20 21</sup>  
36  
37  
38 During standard 75-g OGTT, men and women take the same amount of glucose, which  
39  
40  
41 is thought to be high dosage for women relative to their body size. In our study,  
42  
43  
44 however, men had significantly higher levels of both fasting and postload glucose  
45  
46  
47 concentrations during OGTT. Moreover, male gender was associated with lower beta  
48  
49  
50 cell function and the risk of glucose intolerance. These findings might indicate that men  
51  
52  
53 with VLBW are more predisposed to diabetes than women; indeed, recent studies have  
54  
55  
56 shown that male premature infants are more vulnerable than females.<sup>22-27</sup> In particular,  
57  
58  
59  
60



1  
2  
3  
4  
5  
6 the male sex is associated with various adverse outcomes including death,<sup>25 27</sup>  
7  
8  
9 respiratory dysfunction,<sup>22</sup> intraventricular hemorrhage,<sup>24</sup> autism spectrum,<sup>23</sup> and  
10  
11 neurodevelopmental impairment.<sup>26</sup> Interestingly, in the present study, the mean value of  
12  
13 height (155cm) in women with VLBW is close to the average value of the Japanese  
14  
15 female population (158cm), whereas men with VLBW (164cm) were found to be  
16  
17 shorter compared to the Japanese male population (171cm) (average height data of  
18  
19 Japanese population were drawn from the report by the Ministry of Education, Culture,  
20  
21 Sports, Science, and Technology in Japan).<sup>28</sup> In a previous study, young adults who had  
22  
23 been born SGA were shorter and had higher glucose levels than those with a normal  
24  
25 birth weight.<sup>29</sup> Reduced final height might be long term consequences of intrauterine  
26  
27 retardation, which would also influence glucose regulation. Further investigation is  
28  
29 needed to clarify whether the influence of VLBW on physical growth is more  
30  
31 remarkable in male than female infants, and elucidate the relationship between physical  
32  
33 growth and glucose regulation.  
34  
35  
36  
37  
38  
39  
40  
41  
42  
43  
44  
45

46 Previous studies have shown that SGA itself is associated with glucose intolerance.<sup>30</sup>  
47  
48 In our study, SGA was not significantly associated with hyperglycemia in total subjects,  
49  
50 but was associated in male subjects. The influence of SGA on glucose regulation in  
51  
52 young adults with VLBW might be stronger in male than females. It is possible that this  
53  
54  
55  
56  
57  
58  
59  
60

1  
2  
3  
4  
5  
6 gender difference in glucose regulation is owing to the gender difference in the strength  
7  
8  
9 of SGA effect.  
10

### 11 12 13 14 15 **Strength and weakness of the study** 16

17  
18 The major strength of our study is a well-characterized cohort of subjects with VLBW,  
19  
20 who are quite rare in the general population (approximately 0.5% in this generation).<sup>31</sup>  
21  
22

23  
24 Our study includes a relatively large number of young adults with VLBW, and the  
25  
26 individuals with profound complications were carefully excluded in the recruiting  
27  
28 process. In addition, as participants in the cohort were all Japanese, their racial  
29  
30 homogeneity made considerations of ethnic differences in glucose regulation  
31  
32 unnecessary. To date, the glucose regulation of Asian young adults with VLBW has  
33  
34  
35  
36  
37  
38  
39  
40  
41  
42  
43  
44  
45  
46  
47  
48  
49  
50  
51  
52  
53  
54  
55  
56  
57  
58  
59  
60  
61  
62  
63  
64  
65  
66  
67  
68  
69  
70  
71  
72  
73  
74  
75  
76  
77  
78  
79  
80  
81  
82  
83  
84  
85  
86  
87  
88  
89  
90  
91  
92  
93  
94  
95  
96  
97  
98  
99  
100  
101  
102  
103  
104  
105  
106  
107  
108  
109  
110  
111  
112  
113  
114  
115  
116  
117  
118  
119  
120  
121  
122  
123  
124  
125  
126  
127  
128  
129  
130  
131  
132  
133  
134  
135  
136  
137  
138  
139  
140  
141  
142  
143  
144  
145  
146  
147  
148  
149  
150  
151  
152  
153  
154  
155  
156  
157  
158  
159  
160  
161  
162  
163  
164  
165  
166  
167  
168  
169  
170  
171  
172  
173  
174  
175  
176  
177  
178  
179  
180  
181  
182  
183  
184  
185  
186  
187  
188  
189  
190  
191  
192  
193  
194  
195  
196  
197  
198  
199  
200  
201  
202  
203  
204  
205  
206  
207  
208  
209  
210  
211  
212  
213  
214  
215  
216  
217  
218  
219  
220  
221  
222  
223  
224  
225  
226  
227  
228  
229  
230  
231  
232  
233  
234  
235  
236  
237  
238  
239  
240  
241  
242  
243  
244  
245  
246  
247  
248  
249  
250  
251  
252  
253  
254  
255  
256  
257  
258  
259  
260  
261  
262  
263  
264  
265  
266  
267  
268  
269  
270  
271  
272  
273  
274  
275  
276  
277  
278  
279  
280  
281  
282  
283  
284  
285  
286  
287  
288  
289  
290  
291  
292  
293  
294  
295  
296  
297  
298  
299  
300  
301  
302  
303  
304  
305  
306  
307  
308  
309  
310  
311  
312  
313  
314  
315  
316  
317  
318  
319  
320  
321  
322  
323  
324  
325  
326  
327  
328  
329  
330  
331  
332  
333  
334  
335  
336  
337  
338  
339  
340  
341  
342  
343  
344  
345  
346  
347  
348  
349  
350  
351  
352  
353  
354  
355  
356  
357  
358  
359  
360  
361  
362  
363  
364  
365  
366  
367  
368  
369  
370  
371  
372  
373  
374  
375  
376  
377  
378  
379  
380  
381  
382  
383  
384  
385  
386  
387  
388  
389  
390  
391  
392  
393  
394  
395  
396  
397  
398  
399  
400  
401  
402  
403  
404  
405  
406  
407  
408  
409  
410  
411  
412  
413  
414  
415  
416  
417  
418  
419  
420  
421  
422  
423  
424  
425  
426  
427  
428  
429  
430  
431  
432  
433  
434  
435  
436  
437  
438  
439  
440  
441  
442  
443  
444  
445  
446  
447  
448  
449  
450  
451  
452  
453  
454  
455  
456  
457  
458  
459  
460  
461  
462  
463  
464  
465  
466  
467  
468  
469  
470  
471  
472  
473  
474  
475  
476  
477  
478  
479  
480  
481  
482  
483  
484  
485  
486  
487  
488  
489  
490  
491  
492  
493  
494  
495  
496  
497  
498  
499  
500  
501  
502  
503  
504  
505  
506  
507  
508  
509  
510  
511  
512  
513  
514  
515  
516  
517  
518  
519  
520  
521  
522  
523  
524  
525  
526  
527  
528  
529  
530  
531  
532  
533  
534  
535  
536  
537  
538  
539  
540  
541  
542  
543  
544  
545  
546  
547  
548  
549  
550  
551  
552  
553  
554  
555  
556  
557  
558  
559  
560  
561  
562  
563  
564  
565  
566  
567  
568  
569  
570  
571  
572  
573  
574  
575  
576  
577  
578  
579  
580  
581  
582  
583  
584  
585  
586  
587  
588  
589  
590  
591  
592  
593  
594  
595  
596  
597  
598  
599  
600  
601  
602  
603  
604  
605  
606  
607  
608  
609  
610  
611  
612  
613  
614  
615  
616  
617  
618  
619  
620  
621  
622  
623  
624  
625  
626  
627  
628  
629  
630  
631  
632  
633  
634  
635  
636  
637  
638  
639  
640  
641  
642  
643  
644  
645  
646  
647  
648  
649  
650  
651  
652  
653  
654  
655  
656  
657  
658  
659  
660  
661  
662  
663  
664  
665  
666  
667  
668  
669  
670  
671  
672  
673  
674  
675  
676  
677  
678  
679  
680  
681  
682  
683  
684  
685  
686  
687  
688  
689  
690  
691  
692  
693  
694  
695  
696  
697  
698  
699  
700  
701  
702  
703  
704  
705  
706  
707  
708  
709  
710  
711  
712  
713  
714  
715  
716  
717  
718  
719  
720  
721  
722  
723  
724  
725  
726  
727  
728  
729  
730  
731  
732  
733  
734  
735  
736  
737  
738  
739  
740  
741  
742  
743  
744  
745  
746  
747  
748  
749  
750  
751  
752  
753  
754  
755  
756  
757  
758  
759  
760  
761  
762  
763  
764  
765  
766  
767  
768  
769  
770  
771  
772  
773  
774  
775  
776  
777  
778  
779  
780  
781  
782  
783  
784  
785  
786  
787  
788  
789  
790  
791  
792  
793  
794  
795  
796  
797  
798  
799  
800  
801  
802  
803  
804  
805  
806  
807  
808  
809  
810  
811  
812  
813  
814  
815  
816  
817  
818  
819  
820  
821  
822  
823  
824  
825  
826  
827  
828  
829  
830  
831  
832  
833  
834  
835  
836  
837  
838  
839  
840  
841  
842  
843  
844  
845  
846  
847  
848  
849  
850  
851  
852  
853  
854  
855  
856  
857  
858  
859  
860  
861  
862  
863  
864  
865  
866  
867  
868  
869  
870  
871  
872  
873  
874  
875  
876  
877  
878  
879  
880  
881  
882  
883  
884  
885  
886  
887  
888  
889  
890  
891  
892  
893  
894  
895  
896  
897  
898  
899  
900  
901  
902  
903  
904  
905  
906  
907  
908  
909  
910  
911  
912  
913  
914  
915  
916  
917  
918  
919  
920  
921  
922  
923  
924  
925  
926  
927  
928  
929  
930  
931  
932  
933  
934  
935  
936  
937  
938  
939  
940  
941  
942  
943  
944  
945  
946  
947  
948  
949  
950  
951  
952  
953  
954  
955  
956  
957  
958  
959  
960  
961  
962  
963  
964  
965  
966  
967  
968  
969  
970  
971  
972  
973  
974  
975  
976  
977  
978  
979  
980  
981  
982  
983  
984  
985  
986  
987  
988  
989  
990  
991  
992  
993  
994  
995  
996  
997  
998  
999  
1000

43  
44 In the present study, we could not obtain information regarding the growth rate in  
45  
46 childhood of all participants. This is a major limitation of the study. The postnatal  
47  
48 growth pattern in infancy has been shown to be associated with later glucose  
49  
50 intolerance.<sup>32-35</sup> The clinical records of participants were written 20 to 30 years ago, and  
51  
52  
53  
54  
55  
56  
57  
58  
59  
60  
61  
62  
63  
64  
65  
66  
67  
68  
69  
70  
71  
72  
73  
74  
75  
76  
77  
78  
79  
80  
81  
82  
83  
84  
85  
86  
87  
88  
89  
90  
91  
92  
93  
94  
95  
96  
97  
98  
99  
100  
101  
102  
103  
104  
105  
106  
107  
108  
109  
110  
111  
112  
113  
114  
115  
116  
117  
118  
119  
120  
121  
122  
123  
124  
125  
126  
127  
128  
129  
130  
131  
132  
133  
134  
135  
136  
137  
138  
139  
140  
141  
142  
143  
144  
145  
146  
147  
148  
149  
150  
151  
152  
153  
154  
155  
156  
157  
158  
159  
160  
161  
162  
163  
164  
165  
166  
167  
168  
169  
170  
171  
172  
173  
174  
175  
176  
177  
178  
179  
180  
181  
182  
183  
184  
185  
186  
187  
188  
189  
190  
191  
192  
193  
194  
195  
196  
197  
198  
199  
200  
201  
202  
203  
204  
205  
206  
207  
208  
209  
210  
211  
212  
213  
214  
215  
216  
217  
218  
219  
220  
221  
222  
223  
224  
225  
226  
227  
228  
229  
230  
231  
232  
233  
234  
235  
236  
237  
238  
239  
240  
241  
242  
243  
244  
245  
246  
247  
248  
249  
250  
251  
252  
253  
254  
255  
256  
257  
258  
259  
260  
261  
262  
263  
264  
265  
266  
267  
268  
269  
270  
271  
272  
273  
274  
275  
276  
277  
278  
279  
280  
281  
282  
283  
284  
285  
286  
287  
288  
289  
290  
291  
292  
293  
294  
295  
296  
297  
298  
299  
300  
301  
302  
303  
304  
305  
306  
307  
308  
309  
310  
311  
312  
313  
314  
315  
316  
317  
318  
319  
320  
321  
322  
323  
324  
325  
326  
327  
328  
329  
330  
331  
332  
333  
334  
335  
336  
337  
338  
339  
340  
341  
342  
343  
344  
345  
346  
347  
348  
349  
350  
351  
352  
353  
354  
355  
356  
357  
358  
359  
360  
361  
362  
363  
364  
365  
366  
367  
368  
369  
370  
371  
372  
373  
374  
375  
376  
377  
378  
379  
380  
381  
382  
383  
384  
385  
386  
387  
388  
389  
390  
391  
392  
393  
394  
395  
396  
397  
398  
399  
400  
401  
402  
403  
404  
405  
406  
407  
408  
409  
410  
411  
412  
413  
414  
415  
416  
417  
418  
419  
420  
421  
422  
423  
424  
425  
426  
427  
428  
429  
430  
431  
432  
433  
434  
435  
436  
437  
438  
439  
440  
441  
442  
443  
444  
445  
446  
447  
448  
449  
450  
451  
452  
453  
454  
455  
456  
457  
458  
459  
460  
461  
462  
463  
464  
465  
466  
467  
468  
469  
470  
471  
472  
473  
474  
475  
476  
477  
478  
479  
480  
481  
482  
483  
484  
485  
486  
487  
488  
489  
490  
491  
492  
493  
494  
495  
496  
497  
498  
499  
500  
501  
502  
503  
504  
505  
506  
507  
508  
509  
510  
511  
512  
513  
514  
515  
516  
517  
518  
519  
520  
521  
522  
523  
524  
525  
526  
527  
528  
529  
530  
531  
532  
533  
534  
535  
536  
537  
538  
539  
540  
541  
542  
543  
544  
545  
546  
547  
548  
549  
550  
551  
552  
553  
554  
555  
556  
557  
558  
559  
560  
561  
562  
563  
564  
565  
566  
567  
568  
569  
570  
571  
572  
573  
574  
575  
576  
577  
578  
579  
580  
581  
582  
583  
584  
585  
586  
587  
588  
589  
590  
591  
592  
593  
594  
595  
596  
597  
598  
599  
600  
601  
602  
603  
604  
605  
606  
607  
608  
609  
610  
611  
612  
613  
614  
615  
616  
617  
618  
619  
620  
621  
622  
623  
624  
625  
626  
627  
628  
629  
630  
631  
632  
633  
634  
635  
636  
637  
638  
639  
640  
641  
642  
643  
644  
645  
646  
647  
648  
649  
650  
651  
652  
653  
654  
655  
656  
657  
658  
659  
660  
661  
662  
663  
664  
665  
666  
667  
668  
669  
670  
671  
672  
673  
674  
675  
676  
677  
678  
679  
680  
681  
682  
683  
684  
685  
686  
687  
688  
689  
690  
691  
692  
693  
694  
695  
696  
697  
698  
699  
700  
701  
702  
703  
704  
705  
706  
707  
708  
709  
710  
711  
712  
713  
714  
715  
716  
717  
718  
719  
720  
721  
722  
723  
724  
725  
726  
727  
728  
729  
730  
731  
732  
733  
734  
735  
736  
737  
738  
739  
740  
741  
742  
743  
744  
745  
746  
747  
748  
749  
750  
751  
752  
753  
754  
755  
756  
757  
758  
759  
760  
761  
762  
763  
764  
765  
766  
767  
768  
769  
770  
771  
772  
773  
774  
775  
776  
777  
778  
779  
780  
781  
782  
783  
784  
785  
786  
787  
788  
789  
790  
791  
792  
793  
794  
795  
796  
797  
798  
799  
800  
801  
802  
803  
804  
805  
806  
807  
808  
809  
810  
811  
812  
813  
814  
815  
816  
817  
818  
819  
820  
821  
822  
823  
824  
825  
826  
827  
828  
829  
830  
831  
832  
833  
834  
835  
836  
837  
838  
839  
840  
841  
842  
843  
844  
845  
846  
847  
848  
849  
850  
851  
852  
853  
854  
855  
856  
857  
858  
859  
860  
861  
862  
863  
864  
865  
866  
867  
868  
869  
870  
871  
872  
873  
874  
875  
876  
877  
878  
879  
880  
881  
882  
883  
884  
885  
886  
887  
888  
889  
890  
891  
892  
893  
894  
895  
896  
897  
898  
899  
900  
901  
902  
903  
904  
905  
906  
907  
908  
909  
910  
911  
912  
913  
914  
915  
916  
917  
918  
919  
920  
921  
922  
923  
924  
925  
926  
927  
928  
929  
930  
931  
932  
933  
934  
935  
936  
937  
938  
939  
940  
941  
942  
943  
944  
945  
946  
947  
948  
949  
950  
951  
952  
953  
954  
955  
956  
957  
958  
959  
960  
961  
962  
963  
964  
965  
966  
967  
968  
969  
970  
971  
972  
973  
974  
975  
976  
977  
978  
979  
980  
981  
982  
983  
984  
985  
986  
987  
988  
989  
990  
991  
992  
993  
994  
995  
996  
997  
998  
999  
1000

1  
2  
3  
4  
5  
6 age, smoking, gestational diabetes, and perinatal complications were not available in the  
7  
8  
9 present study. These factors might have affected fetal malnutrition and subsequently led  
10  
11 to VLBW. In terms of subjects in the present study, our study has no control subjects,  
12  
13 presenting a limitation of demonstrating the impact of VLBW itself on glucose  
14  
15 regulation. Another concern of the study is selection bias. Of 301 VLBW subjects who  
16  
17 were thought to receive the invitation letters, 111 subjects participated in the study  
18  
19 (37%). The findings should be carefully interpreted taking into account the possibility  
20  
21 that the participants might not be representative of general young adults with VLBW.  
22  
23  
24  
25  
26  
27  
28  
29  
30  
31

### 32 **Future Perspective**

33  
34  
35 As neonatal intensive care is making steady progress, an increasing number of young  
36  
37 adults with VLBW worldwide will face a greater variety of health problems. Clinician  
38  
39 should be aware of the risk of hyperglycemia in young adults with VLBW, and follow  
40  
41 up them for a longer period of time. It may be worthwhile for them to check their  
42  
43 glucose metabolism with OGTT in their twenties or thirties, which would lead to early  
44  
45 intervention in their lifestyle and subsequently contribute to prevention of type 2  
46  
47 diabetes and cardiovascular disease.<sup>5-7</sup> In the present study, we have found that male  
48  
49  
50  
51  
52  
53  
54  
55  
56  
57  
58  
59  
60  
gender was a significant independent risk factor of hyperglycemia in young adults with

1  
2  
3  
4  
5  
6 VLBW. In addition to the gender difference, future studies are required to focus on the  
7  
8  
9 factors affecting the glucose metabolism in VLBW infants.  
10  
11  
12  
13

14 **Acknowledgment:** The authors thank all the participants in this study; the pediatricians  
15  
16 who have treated the participants in their neonatal periods; the colleagues who made a  
17  
18 great contribution to the study as clinical research coordinators: Masahiro Asano,  
19  
20 Kikuko Tejima, Emiko Morita, Mari Suzuki, Kaoru Kikuchi, and Chieko Suzuki; the  
21  
22 colleagues who played vital roles by excellent technical assistance: Hiromi Kajima,  
23  
24 Takako Akiyama, and Masato Shouji; and Keisuke Ishii and Gregory O'Dowd for  
25  
26 encouraging advice on the present study.  
27  
28  
29  
30  
31  
32  
33  
34  
35  
36  
37

38 **Contributors:** RS and HW drafted the paper. RS conceived the study. RS and KS  
39  
40 developed the idea. RS, HW, KS, SO, RG, MM, and HN were involved in study design.  
41  
42 RS and KS participated in data acquisition. RS, HW, HM, EI, MT, and MM were  
43  
44 engaged in data analysis. All the authors contributed to the interpretation of the findings.  
45  
46  
47  
48  
49 All the authors were involved in the revision and approved the final version.  
50  
51

52 **Funding:** This study was partly supported by grants from the Japan Society for the  
53  
54 Promotion of Science (21390180) and from the Ministry of Health, Labour and Welfare  
55  
56  
57  
58  
59  
60

1  
2  
3  
4  
5  
6 in Japan (H23-Cardiovascular disease and Diabetes-011).  
7

8  
9 **Competing Interest:** None.  
10

11 **Ethical approval:** The study was approved by the ethical committee of Seirei  
12  
13 Hamamatsu General Hospital. All participants provided written informed consent to  
14  
15 participate in the study.  
16  
17  
18

19  
20 **Data sharing statement:** Data will not be publically accessible. However, interested  
21  
22 individuals may contact the authors.  
23  
24  
25  
26  
27  
28  
29  
30  
31  
32  
33  
34  
35  
36  
37  
38  
39  
40  
41  
42  
43  
44  
45  
46  
47  
48  
49  
50  
51  
52  
53  
54  
55  
56  
57  
58  
59  
60

## REFERENCES

1. Field DJ, Dorling JS, Manktelow BN, et al. Survival of extremely premature babies in a geographically defined population: prospective cohort study of 1994-9 compared with 2000-5. *BMJ* 2008;336(7655):1221-3.
2. Barker DJ, Gluckman PD, Godfrey KM, et al. Fetal nutrition and cardiovascular disease in adult life. *Lancet* 1993;341(8850):938-41.
3. Kaijser M, Bonamy AK, Akre O, et al. Perinatal risk factors for diabetes in later life. *Diabetes* 2009;58(3):523-6.
4. Whincup PH, Kaye SJ, Owen CG, et al. Birth weight and risk of type 2 diabetes: a systematic review. *JAMA* 2008;300(24):2886-97.
5. Knowler WC, Barrett-Connor E, Fowler SE, et al. Reduction in the incidence of type 2 diabetes with lifestyle intervention or metformin. *N Engl J Med* 2002;346(6):393-403.
6. Eriksson KF, Lindgarde F. Prevention of type 2 (non-insulin-dependent) diabetes mellitus by diet and physical exercise. The 6-year Malmo feasibility study. *Diabetologia* 1991;34(12):891-8.
7. Tuomilehto J, Lindstrom J, Eriksson JG, et al. Prevention of type 2 diabetes mellitus by changes in lifestyle among subjects with impaired glucose tolerance. *N Engl J Med* 2001;344(18):1343-50.
8. Crump C, Winkleby MA, Sundquist K, et al. Risk of diabetes among young adults born preterm in Sweden. *Diabetes Care* 2011;34(5):1109-13.
9. Hovi P, Andersson S, Eriksson JG, et al. Glucose regulation in young adults with very low birth weight. *N Engl J Med* 2007;356(20):2053-63.
10. The study group of the Health Ministry in Japan. Fetal growth curves of Japanese, 1994. pp 61.
11. World Health Organization. Definition, diagnosis and classification of diabetes mellitus and its complications. Geneva: World Health Organization, 1999.
12. Abdul-Ghani MA, Abdul-Ghani T, Ali N, et al. One-hour plasma glucose concentration and the metabolic syndrome identify subjects at high risk for future type 2 diabetes. *Diabetes Care* 2008;31(8):1650-5.
13. Succurro E, Marini MA, Arturi F, et al. Elevated one-hour post-load plasma glucose levels identifies subjects with normal glucose tolerance but early carotid atherosclerosis. *Atherosclerosis* 2009;207(1):245-9.
14. Zammitt NN, Frier BM. Hypoglycemia in type 2 diabetes: pathophysiology, frequency, and effects of different treatment modalities. *Diabetes Care*

- 2005;28(12):2948-61.
15. The Committee of Japan Diabetes Society on the diagnostic criteria of diabetes mellitus. Report of the Committee on the classification and diagnostic criteria of diabetes mellitus. *J Japan Diab Soc* 2010; 53 450-67.
  16. Matthews DR, Hosker JP, Rudenski AS, et al. Homeostasis model assessment: insulin resistance and beta-cell function from fasting plasma glucose and insulin concentrations in man. *Diabetologia* 1985;28(7):412-9.
  17. Matsuo S, Imai E, Horio M, et al. Revised equations for estimated GFR from serum creatinine in Japan. *Am J Kidney Dis* 2009;53(6):982-92.
  18. The Ministry of Health, Labour, and Welfare. The National Health and Nutrition Survey in Japan, 2007. pp 187.
  19. Willemsen RH, Leunissen RW, Stijnen T, et al. Prematurity is not associated with reduced insulin sensitivity in adulthood. *J Clin Endocrinol Metab* 2009;94(5):1695-700.
  20. Faerch K, Borch-Johnsen K, Vaag A, et al. Sex differences in glucose levels: a consequence of physiology or methodological convenience? The Inter99 study. *Diabetologia* 2010;53(5):858-65.
  21. Sicree RA, Zimmet PZ, Dunstan DW, et al. Differences in height explain gender differences in the response to the oral glucose tolerance test- the AusDiab study. *Diabet Med* 2008;25(3):296-302.
  22. Henderson-Smart DJ, Hutchinson JL, Donoghue DA, et al. Prenatal predictors of chronic lung disease in very preterm infants. *Arch Dis Child Fetal Neonatal Ed* 2006;91(1):F40-5.
  23. Johnson S, Hollis C, Kochhar P, et al. Autism spectrum disorders in extremely preterm children. *J Pediatr* 2010;156(4):525-31 e2.
  24. Mohamed MA, Aly H. Male gender is associated with intraventricular hemorrhage. *Pediatrics* 2010;125(2):e333-9.
  25. Morse SB, Wu SS, Ma C, et al. Racial and gender differences in the viability of extremely low birth weight infants: a population-based study. *Pediatrics* 2006;117(1):e106-12.
  26. Spinillo A, Montanari L, Gardella B, et al. Infant sex, obstetric risk factors, and 2-year neurodevelopmental outcome among preterm infants. *Dev Med Child Neurol* 2009;51(7):518-25.
  27. Tyson JE, Parikh NA, Langer J, et al. Intensive care for extreme prematurity--moving beyond gestational age. *N Engl J Med* 2008;358(16):1672-81.

- 1  
2  
3  
4  
5  
6  
7  
8  
9  
10  
11  
12  
13  
14  
15  
16  
17  
18  
19  
20  
21  
22  
23  
24  
25  
26  
27  
28  
29  
30  
31  
32  
33  
34  
35  
36  
37  
38  
39  
40  
41  
42  
43  
44  
45  
46  
47  
48  
49  
50  
51  
52  
53  
54  
55  
56  
57  
58  
59  
60
28. The Ministry of Education, Culture, Sports, Science, and Technology in Japan. A report of school health statistics, 2004.
  29. Leger J, Levy-Marchal C, Bloch J, et al. Reduced final height and indications for insulin resistance in 20 year olds born small for gestational age: regional cohort study. *BMJ* 1997;315(7104):341-7.
  30. Saenger P, Czernichow P, Hughes I, et al. Small for gestational age: short stature and beyond. *Endocr Rev* 2007;28(2):219-51.
  31. The Statistics and Information Department, Minister's Secretariat, Ministry of Health, Labour, and Welfare. Vital Statistics in Japan, 2009. Vol.1. pp 124-127.
  32. Crowther NJ, Cameron N, Trusler J, et al. Influence of catch-up growth on glucose tolerance and beta-cell function in 7-year-old children: results from the birth to twenty study. *Pediatrics* 2008;121(6):e1715-22.
  33. Eriksson JG, Osmond C, Kajantie E, et al. Patterns of growth among children who later develop type 2 diabetes or its risk factors. *Diabetologia* 2006;49(12):2853-8.
  34. Finken MJ, Keijzer-Veen MG, Dekker FW, et al. Preterm birth and later insulin resistance: effects of birth weight and postnatal growth in a population based longitudinal study from birth into adult life. *Diabetologia* 2006;49(3):478-85.
  35. Leunissen RW, Kerkhof GF, Stijnen T, et al. Timing and tempo of first-year rapid growth in relation to cardiovascular and metabolic risk profile in early adulthood. *JAMA* 2009;301(21):2234-42.



**Table 1. Clinical characteristics of young adults with very low birth weight (VLBW) at birth and at study assessment**

|                                                 | Total<br>(n=111) | Men (n=42)    |              | Women (n=69) |              |
|-------------------------------------------------|------------------|---------------|--------------|--------------|--------------|
|                                                 |                  | SGA* (n=14)   | AGA (n=28)   | SGA* (n=25)  | AGA (n=44)   |
| <b>At birth</b>                                 |                  |               |              |              |              |
| Gestational Age (wk)                            | 29.7 (3.1)       | 31.5 (3.7)    | 28.1 (1.9)   | 33.0 (2.6)   | 28.2 (1.9)   |
| Weight (g)                                      | 1152 (235)       | 1050 (223)    | 1149 (235)   | 1190 (239)   | 1166 (236)   |
| ELBW                                            | 33 (29.7)        | 6 (42.9)      | 10 (35.7)    | 7 (28.0)     | 10 (22.7)    |
| Birth from multiple pregnancy                   | 18 (16.2)        | 2 (21.4)      | 7 (25.0)     | 1 (4.0)      | 8 (18.1)     |
| <b>At study assessment</b>                      |                  |               |              |              |              |
| Age (yr)                                        | 24.8 (3.0)       | 24.9 (2.9)    | 24.6 (3.6)   | 23.9 (2.9)   | 25.4 (2.7)   |
| Family history of diabetes                      | 22 (19.8)        | 2 (14.3)      | 5 (17.9)     | 7 (28.0)     | 8 (18.2)     |
| Height (m)                                      | 1.58 (0.07)      | 1.60 (0.06)   | 1.66 (0.06)  | 1.54 (0.06)  | 1.55 (0.05)  |
| Body Weight (kg)                                | 52.3 (10.1)      | 53.1 (8.8)    | 55.8 (8.9)   | 47.5 (8.3)   | 52.4 (11.3)  |
| BMI (kg/m <sup>2</sup> )                        | 20.9 (3.8)       | 20.8 (3.2)    | 20.3 (2.8)   | 20.1 (3.0)   | 21.7 (4.7)   |
| Blood pressure (mmHg)                           |                  |               |              |              |              |
| Systolic                                        | 118 (16)         | 120 (18)      | 121 (17)     | 115 (12)     | 117 (16)     |
| Diastolic                                       | 70 (11)          | 69 (15)       | 69 (11)      | 69 (11)      | 71 (11)      |
| Cholesterol (mg/dl)                             |                  |               |              |              |              |
| Total                                           | 184.8 (31.3)     | 210.6 (52.0)  | 183.4 (25.2) | 180.4 (27.2) | 179.9 (25.1) |
| LDL                                             | 104.3 (28.4)     | 126.9 (48.6)  | 104.8 (24.8) | 100.3 (21.5) | 99.0 (22.6)  |
| HDL                                             | 65.7 (13.3)      | 63.2 (14.0)   | 64.6 (14.1)  | 64.6 (15.1)  | 67.8 (11.6)  |
| Triglycerides (mg/dl)                           | 81.8 (72.2)      | 126.5 (139.9) | 81.0 (84.5)  | 85.4 (51.0)  | 65.9 (23.5)  |
| Renal function                                  |                  |               |              |              |              |
| Creatinine (mg/dl)                              | 0.66 (0.13)      | 0.76 (0.09)   | 0.80 (0.11)  | 0.59 (0.08)  | 0.58 (0.08)  |
| eGFR (ml/min/1.73 m <sup>2</sup> ) <sup>†</sup> | 104.6 (18.4)     | 105.5 (13.9)  | 101.8 (19.4) | 104.3 (18.2) | 106.3 (19.5) |

SGA, small for gestational age; AGA, appropriate for gestational age; ELBW, extremely low birth weight (<1000g); BMI, body mass index; eGFR, estimated glomerular filtration rate; LDL, low-density lipoprotein; HDL, high-density lipoprotein.

Data are expressed as mean (SD) or number (%).

1  
2  
3  
4  
5 \*Determined by a birth weight below the 10th percentile for gestational age according  
6 to standards defined by a study group of the Health Ministry in Japan.  
7

8 †Calculated according to the formula recommended by the Japanese Society of  
9 Nephrology:  $eGFR \text{ (ml/min/1.73m}^2\text{)} = 194 \times \text{Cre}^{-1.094} \times \text{Age}^{-0.287}$  ( $\times 0.739$  if the subject  
10 is a woman).  
11  
12  
13  
14  
15  
16  
17  
18  
19  
20  
21  
22  
23  
24  
25  
26  
27  
28  
29  
30  
31  
32  
33  
34  
35  
36  
37  
38  
39  
40  
41  
42  
43  
44  
45  
46  
47  
48  
49  
50  
51  
52  
53  
54  
55  
56  
57  
58  
59  
60

For peer review only

**Table 2. Correlated factors for hyperglycemia\* in young adults with very low birth weight (VLBW) assessed by logistic regression analyses**

| Variable                           | Odds Ratio† | 95% CI      | P-value |
|------------------------------------|-------------|-------------|---------|
| <b>Gender (Male)</b>               | 3.34        | 1.08 - 10.3 | 0.036   |
| <b>Factors at birth</b>            |             |             |         |
| Gestational age (wk)               | 0.77        | 0.53 - 1.12 | 0.165   |
| Weight (0.1kg)                     | 1.39        | 0.96 - 2.02 | 0.085   |
| SGA                                | 2.56        | 0.37 - 17.5 | 0.340   |
| <b>Factors at study assessment</b> |             |             |         |
| Family history of diabetes         | 1.92        | 0.49 - 7.57 | 0.353   |
| BMI (kg/m <sup>2</sup> )           | 1.29        | 1.11 - 1.49 | 0.001   |

SGA, small for gestational age; BMI, body mass index.

\*A category of hyperglycemia includes Diabetes, IGT (impaired glucose tolerance), IFG (impaired fasting glycaemia), and Non-diabetes/IGT/IFG with elevated 1-hour glucose levels (> 8.6mmol/l).

†Each odds ratio is calculated from a model including gender, family history of diabetes, BMI, gestational age, birth weight, and SGA/AGA (appropriate for gestational age).

**Table 3. Gender differences in glucose regulation in young adults with very low birth weight (VLBW)**

|                                                           | Men (n=42)           | Women (n=69)          | P-value |
|-----------------------------------------------------------|----------------------|-----------------------|---------|
| Hyperglycemia                                             | 11 (26.2)            | 10 (14.5)             | 0.127   |
| Diabetes                                                  | 0                    | 1                     |         |
| IGT                                                       | 2                    | 4                     |         |
| IFG                                                       | 1                    | 0                     |         |
| Non-diabetes/IGT/IFG with elevated 1-hour glucose levels* | 8                    | 5                     |         |
| HbA1c (%)                                                 | 5.39 (5.31 - 5.47)   | 5.39 (5.31 - 5.47)    | 0.635   |
| HOMA- $\beta$                                             | 72.5 (59.0 - 86.0)   | 103 (87.2 - 119.6)    | 0.001   |
| HOMA-IR                                                   | 1.4 (1.14 - 1.69)    | 1.6 (1.29 - 1.90)     | 0.477   |
| Variable during OGTT                                      |                      |                       |         |
| Insulinogenic Index                                       | 1.1 (0.64 - 1.60)    | 1.4 (1.18 - 1.71)     | 0.002   |
| Glucose <sub>AUC</sub> (mmol/l $\times$ hr)               | 18.8 (17.9 - 19.7)   | 18.2 (17.3 - 19.0)    | 0.089   |
| Insulin <sub>AUC</sub> ( $\mu$ U/ml $\times$ hr)          | 135.3 (98.7 - 171.9) | 145.1 (121.7 - 168.6) | 0.052   |
| Reactive hypoglycemia                                     | 17 (40)              | 17 (25)               | 0.079   |

IGT, impaired glucose tolerance; IFG, impaired fasting glycemia; HOMA- $\beta$ , homeostasis model of assessment for beta cell; HOMA-IR, homeostasis model of assessment for insulin resistance.

Data are expressed as mean (95% CI) or number (%).

\*Defined as 1-hour glucose levels > 8.6mmol/l.

## Figure Legends

### Figure 1. Flow of participants through the study.

(There is no figure legend in Figure 1.)

### Figure 2. The gender differences of glucose and insulin levels during OGTT in young adults with very low birth weight (VLBW).

The top and bottom of the box indicate lower and upper quartiles; the line inside the box represents the median; the whiskers indicate the most extreme data points within 1.5 times of interquartile range from the box; dots indicate outliers. Male subjects had significantly higher levels of glucose and lower levels of insulin during OGTT than female subjects ( $p < 0.001$  for glucose and  $p = 0.005$  for insulin by repeated measure ANOVA).

**The numerical data of Figure 2.**

**Male (n=42)**

|                        | 0 (min)           | 30               | 60               | 90               | 120              | 180              |
|------------------------|-------------------|------------------|------------------|------------------|------------------|------------------|
| Plasma glucose (mg/dl) | 5.208<br>(0.3695) | 8.579<br>(1.272) | 7.167<br>(1.824) | 6.262<br>(1.523) | 5.749<br>(1.102) | 4.360<br>(1.205) |
| Insulin (microU/ml)    | 6.057<br>(3.519)  | 64.95<br>(64.53) | 53.70<br>(47.86) | 53.27<br>(49.61) | 49.84<br>(50.66) | 20.94<br>(24.37) |

**Female (n=69)**

|                        | 0 (min)           | 30               | 60               | 90               | 120              | 180              |
|------------------------|-------------------|------------------|------------------|------------------|------------------|------------------|
| Plasma glucose (mg/dl) | 4.930<br>(0.4266) | 7.529<br>(1.460) | 6.596<br>(1.946) | 6.178<br>(1.541) | 5.829<br>(1.487) | 4.881<br>(1.121) |
| Insulin (microU/ml)    | 7.090<br>(5.107)  | 66.22<br>(42.62) | 57.09<br>(51.97) | 54.95<br>(44.39) | 51.11<br>(39.85) | 31.82<br>(28.03) |

**Data are expressed as mean (SD).**

**Figure 1. Flow of Participants through the study.**

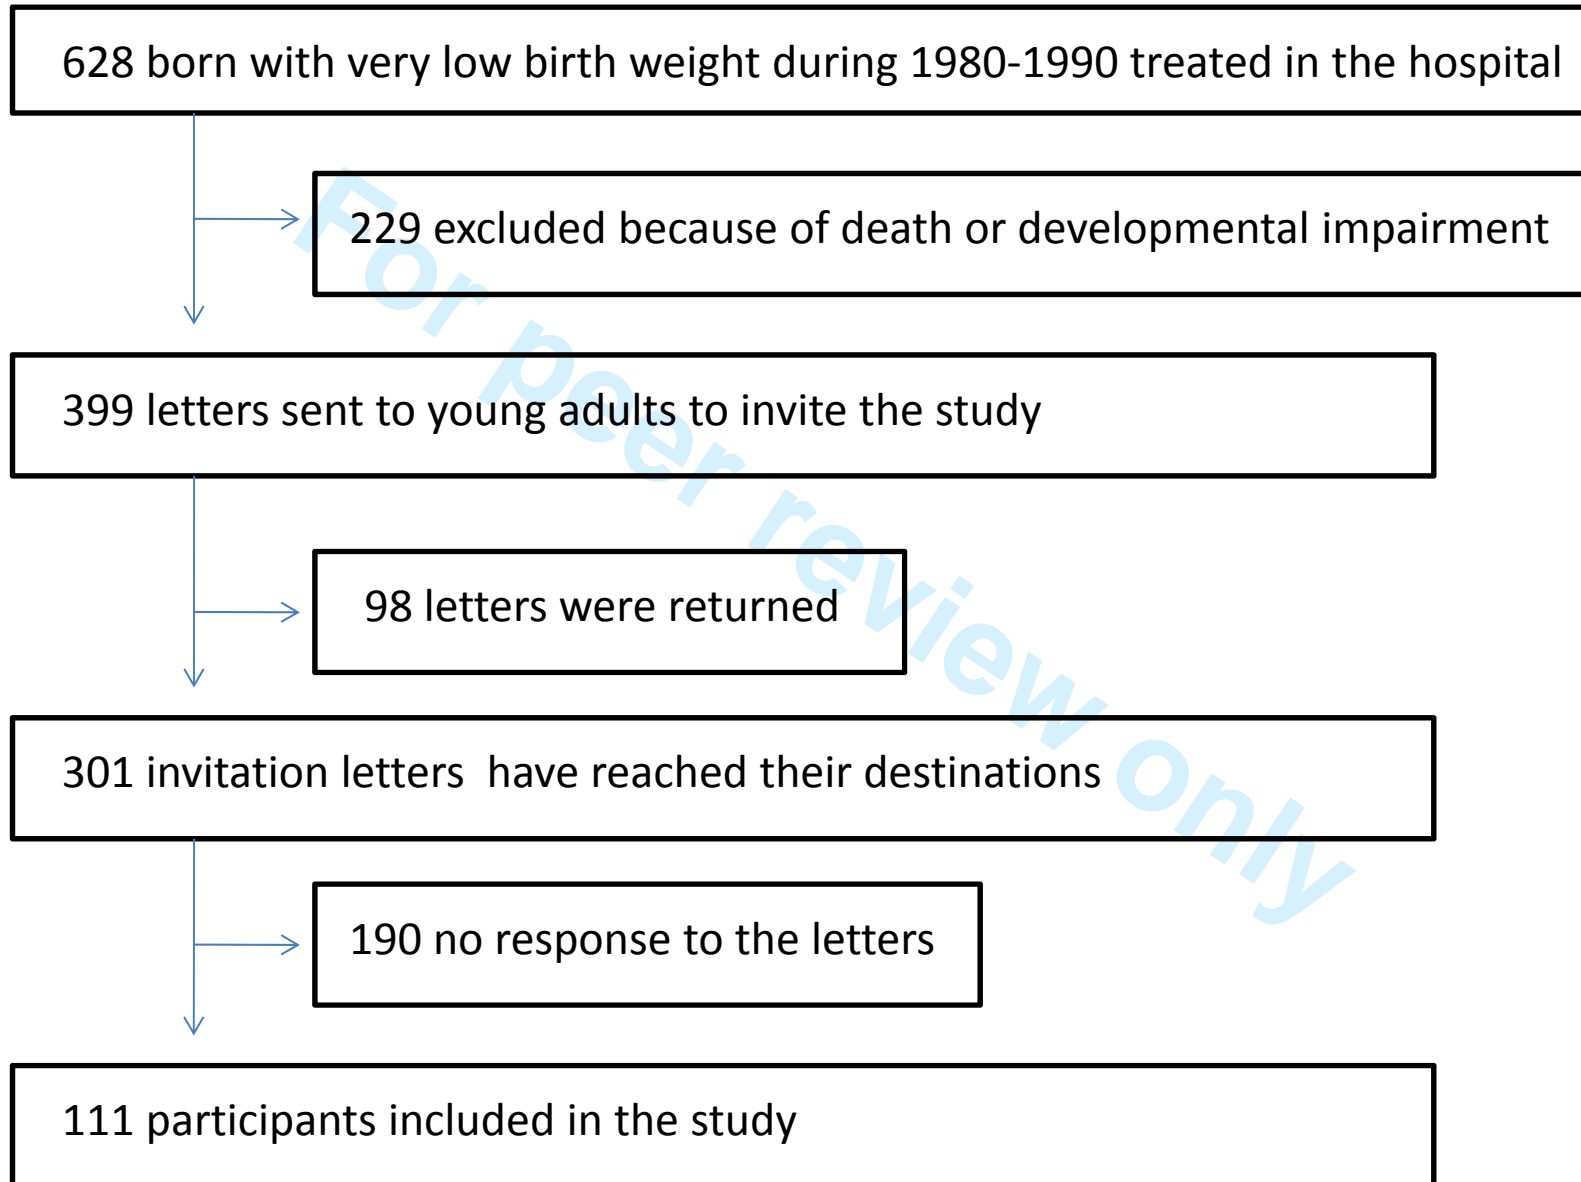

**Figure 2. The gender differences of glucose and insulin levels during OGTT in young adults with very low birth weight (VLBW).**

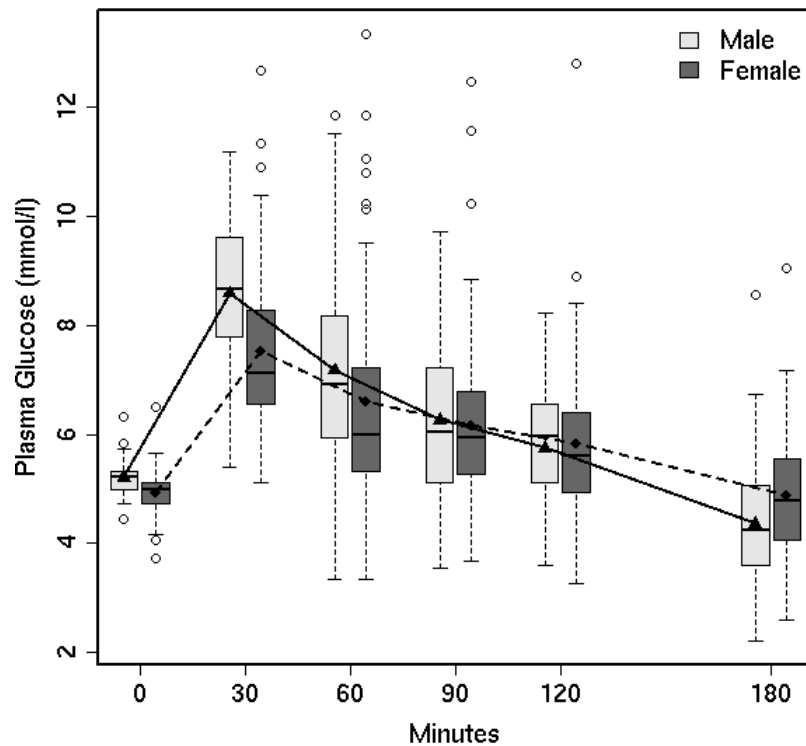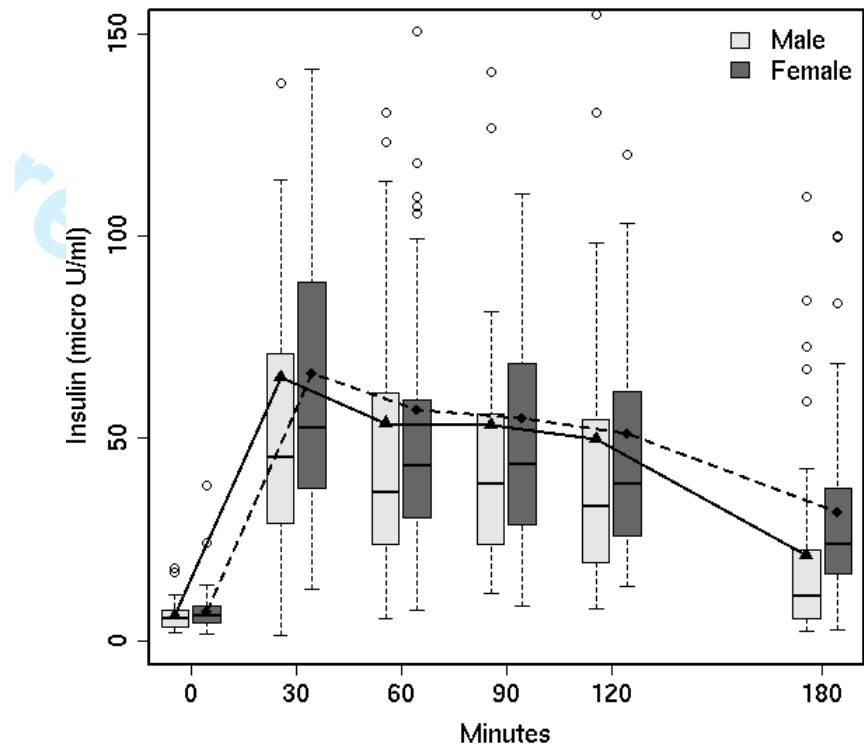



STROBE 2007 (v4) Statement—Checklist of items that should be included in reports of *cross-sectional studies*

| Section/Topic                | Item # | Recommendation                                                                                                                                                                       | Reported on page # |
|------------------------------|--------|--------------------------------------------------------------------------------------------------------------------------------------------------------------------------------------|--------------------|
| Title and abstract           | 1      | (a) Indicate the study's design with a commonly used term in the title or the abstract                                                                                               | 3                  |
|                              |        | (b) Provide in the abstract an informative and balanced summary of what was done and what was found                                                                                  | 3                  |
| <b>Introduction</b>          |        |                                                                                                                                                                                      |                    |
| Background/rationale         | 2      | Explain the scientific background and rationale for the investigation being reported                                                                                                 | 7                  |
| Objectives                   | 3      | State specific objectives, including any prespecified hypotheses                                                                                                                     | 7                  |
| <b>Methods</b>               |        |                                                                                                                                                                                      |                    |
| Study design                 | 4      | Present key elements of study design early in the paper                                                                                                                              | 8                  |
| Setting                      | 5      | Describe the setting, locations, and relevant dates, including periods of recruitment, exposure, follow-up, and data collection                                                      | 8                  |
| Participants                 | 6      | (a) Give the eligibility criteria, and the sources and methods of selection of participants                                                                                          | 8                  |
| Variables                    | 7      | Clearly define all outcomes, exposures, predictors, potential confounders, and effect modifiers. Give diagnostic criteria, if applicable                                             | 9-10               |
| Data sources/<br>measurement | 8*     | For each variable of interest, give sources of data and details of methods of assessment (measurement). Describe comparability of assessment methods if there is more than one group | n/a                |
| Bias                         | 9      | Describe any efforts to address potential sources of bias                                                                                                                            | 18                 |
| Study size                   | 10     | Explain how the study size was arrived at                                                                                                                                            | 8                  |
| Quantitative variables       | 11     | Explain how quantitative variables were handled in the analyses. If applicable, describe which groupings were chosen and why                                                         | 10                 |
| Statistical methods          | 12     | (a) Describe all statistical methods, including those used to control for confounding                                                                                                | 10-12              |
|                              |        | (b) Describe any methods used to examine subgroups and interactions                                                                                                                  | 13                 |
|                              |        | (c) Explain how missing data were addressed                                                                                                                                          | n/a                |
|                              |        | (d) If applicable, describe analytical methods taking account of sampling strategy                                                                                                   | n/a                |
|                              |        | (e) Describe any sensitivity analyses                                                                                                                                                | n/a                |
| <b>Results</b>               |        |                                                                                                                                                                                      |                    |

|                          |     |                                                                                                                                                                                                              |          |
|--------------------------|-----|--------------------------------------------------------------------------------------------------------------------------------------------------------------------------------------------------------------|----------|
| Participants             | 13* | (a) Report numbers of individuals at each stage of study—eg numbers potentially eligible, examined for eligibility, confirmed eligible, included in the study, completing follow-up, and analysed            | 8        |
|                          |     | (b) Give reasons for non-participation at each stage                                                                                                                                                         | 8        |
|                          |     | (c) Consider use of a flow diagram                                                                                                                                                                           | Figure 1 |
| Descriptive data         | 14* | (a) Give characteristics of study participants (eg demographic, clinical, social) and information on exposures and potential confounders                                                                     | Table 1  |
|                          |     | (b) Indicate number of participants with missing data for each variable of interest                                                                                                                          | n/a      |
| Outcome data             | 15* | Report numbers of outcome events or summary measures                                                                                                                                                         | n/a      |
| Main results             | 16  | (a) Give unadjusted estimates and, if applicable, confounder-adjusted estimates and their precision (eg, 95% confidence interval). Make clear which confounders were adjusted for and why they were included | 12-14    |
|                          |     | (b) Report category boundaries when continuous variables were categorized                                                                                                                                    | n/a      |
|                          |     | (c) If relevant, consider translating estimates of relative risk into absolute risk for a meaningful time period                                                                                             | n/a      |
| Other analyses           | 17  | Report other analyses done—eg analyses of subgroups and interactions, and sensitivity analyses                                                                                                               | 14       |
| <b>Discussion</b>        |     |                                                                                                                                                                                                              |          |
| Key results              | 18  | Summarise key results with reference to study objectives                                                                                                                                                     | 14-15    |
| Limitations              | 19  | Discuss limitations of the study, taking into account sources of potential bias or imprecision. Discuss both direction and magnitude of any potential bias                                                   | 17-18    |
| Interpretation           | 20  | Give a cautious overall interpretation of results considering objectives, limitations, multiplicity of analyses, results from similar studies, and other relevant evidence                                   | 14-18    |
| Generalisability         | 21  | Discuss the generalisability (external validity) of the study results                                                                                                                                        | 17       |
| <b>Other information</b> |     |                                                                                                                                                                                                              |          |
| Funding                  | 22  | Give the source of funding and the role of the funders for the present study and, if applicable, for the original study on which the present article is based                                                | 19       |

\*Give information separately for cases and controls in case-control studies and, if applicable, for exposed and unexposed groups in cohort and cross-sectional studies.

**Note:** An Explanation and Elaboration article discusses each checklist item and gives methodological background and published examples of transparent reporting. The STROBE checklist is best used in conjunction with this article (freely available on the Web sites of PLoS Medicine at <http://www.plosmedicine.org/>, Annals of Internal Medicine at <http://www.annals.org/>, and Epidemiology at <http://www.epidem.com/>). Information on the STROBE Initiative is available at [www.strobe-statement.org](http://www.strobe-statement.org).



**A cross-sectional study of glucose regulation in young adults with very low birth weight: impact of male gender on hyperglycemia**

|                                 |                                                                                                                                                                                                                                                                                                                                                                                                                                                                                                                                                                                                                                                                                                                                                                                                                                                                                                                                                                                                                                                                                                                                                                                                                    |
|---------------------------------|--------------------------------------------------------------------------------------------------------------------------------------------------------------------------------------------------------------------------------------------------------------------------------------------------------------------------------------------------------------------------------------------------------------------------------------------------------------------------------------------------------------------------------------------------------------------------------------------------------------------------------------------------------------------------------------------------------------------------------------------------------------------------------------------------------------------------------------------------------------------------------------------------------------------------------------------------------------------------------------------------------------------------------------------------------------------------------------------------------------------------------------------------------------------------------------------------------------------|
| Journal:                        | <i>BMJ Open</i>                                                                                                                                                                                                                                                                                                                                                                                                                                                                                                                                                                                                                                                                                                                                                                                                                                                                                                                                                                                                                                                                                                                                                                                                    |
| Manuscript ID:                  | bmjopen-2011-000327.R2                                                                                                                                                                                                                                                                                                                                                                                                                                                                                                                                                                                                                                                                                                                                                                                                                                                                                                                                                                                                                                                                                                                                                                                             |
| Article Type:                   | Research                                                                                                                                                                                                                                                                                                                                                                                                                                                                                                                                                                                                                                                                                                                                                                                                                                                                                                                                                                                                                                                                                                                                                                                                           |
| Date Submitted by the Author:   | 25-Dec-2011                                                                                                                                                                                                                                                                                                                                                                                                                                                                                                                                                                                                                                                                                                                                                                                                                                                                                                                                                                                                                                                                                                                                                                                                        |
| Complete List of Authors:       | <p>Sato, Ryosuke; Hamamatsu University School of Medicine, Department of Endocrinology and Metabolism, Division of Internal Medicine II; Seirei Hamamatsu General Hospital, Department of Endocrinology and Metabolism</p> <p>Watanabe, Hiroshi; Hamamatsu University School of Medicine, Department of Clinical Pharmacology and Therapeutics</p> <p>Shirai, Kenji; Seirei Hamamatsu General Hospital, Department of Neonatology</p> <p>Ohki, Shigeru; Seirei Hamamatsu General Hospital, Department of Neonatology</p> <p>Genma, Rieko; Seirei Hamamatsu General Hospital, Department of Endocrinology and Metabolism</p> <p>Morita, Hiroshi; Hamamatsu University School of Medicine, Department of Endocrinology and Metabolism, Division of Internal Medicine II</p> <p>Inoue, Eisuke; Kitasato University, Department of Clinical Medicine (Biostatics)</p> <p>Takeuchi, Masahiro; Kitasato University, Department of Clinical Medicine (Biostatics)</p> <p>Maekawa, Masato; Hamamatsu University School of Medicine, Department of Laboratory Medicine</p> <p>Nakamura, Hirotohi; Hamamatsu University School of Medicine, Department of Endocrinology and Metabolism, Division of Internal Medicine II</p> |
| <b>Primary Subject Heading</b>: | Diabetes and endocrinology                                                                                                                                                                                                                                                                                                                                                                                                                                                                                                                                                                                                                                                                                                                                                                                                                                                                                                                                                                                                                                                                                                                                                                                         |
| Secondary Subject Heading:      | Paediatrics, Cardiovascular medicine                                                                                                                                                                                                                                                                                                                                                                                                                                                                                                                                                                                                                                                                                                                                                                                                                                                                                                                                                                                                                                                                                                                                                                               |
| Keywords:                       | Diabetes Mellitus, Very low birth weight (VLBW), Small for gestational age (SGA), Gender difference, Oral glucose tolerance test (OGTT), hyperglycemia                                                                                                                                                                                                                                                                                                                                                                                                                                                                                                                                                                                                                                                                                                                                                                                                                                                                                                                                                                                                                                                             |
|                                 |                                                                                                                                                                                                                                                                                                                                                                                                                                                                                                                                                                                                                                                                                                                                                                                                                                                                                                                                                                                                                                                                                                                                                                                                                    |

1  
2  
3  
4  
5  
6 **A cross-sectional study of glucose regulation in young adults with very**  
7  
8 **low birth weight: impact of male gender on hyperglycemia**  
9  
10

11  
12  
13  
14  
15 Ryosuke Sato,<sup>1,2</sup> Hiroshi Watanabe,<sup>3</sup> Kenji Shirai,<sup>4</sup> Shigeru Ohki,<sup>4</sup> Rieko Genma,<sup>2</sup>

16  
17  
18 Hiroshi Morita,<sup>1</sup> Eisuke Inoue,<sup>5</sup> Masahiro Takeuchi,<sup>5</sup> Masato Maekawa,<sup>6</sup> Hirotooshi

19  
20 Nakamura<sup>1</sup>  
21  
22  
23  
24  
25

26 **Address and Affiliations (position)**  
27

28  
29 <sup>1</sup>Department of Endocrinology and Metabolism, Division of Internal Medicine II, Hamamatsu  
30 University School of Medicine, 1-20-1, Handayama, Higashi-ku, Hamamatsu, 431-3192, Japan.

31 Ryosuke Sato: Physician

32 Hiroshi Morita: Physician

33 Hirotooshi Nakamura: Professor  
34  
35  
36

37 <sup>2</sup>Department of Endocrinology and Metabolism, Seirei Hamamatsu General Hospital, 2-12-12,  
38 Sumiyoshi, Naka-ku, Hamamatsu, 430-8558, Japan.

39 Ryosuke Sato: Physician

40 Rieko Genma: Physician  
41  
42  
43  
44

45 <sup>3</sup>Department of Clinical Pharmacology and Therapeutics, Hamamatsu University School of  
46 Medicine, 1-20-1, Handayama, Higashi-ku, Hamamatsu, 431-3192, Japan.

47 Hiroshi Watanabe: Professor  
48  
49

50 <sup>4</sup>Department of Neonatology, Seirei Hamamatsu General Hospital, 2-12-12, Sumiyoshi, Naka-ku,  
51 Hamamatsu, 430-8558, Japan.

52 Kenji Shirai: Neonatologist

53 Shigeru Ohki: Neonatologist  
54  
55  
56  
57  
58  
59  
60

<sup>5</sup>Department of Clinical Medicine (Biostatistics), Kitasato University, 5-9-1, Shirokane, Minato-ku, Tokyo, 108-8641, Japan.

Eisuke Inoue: Statistician

Masahiro Takeuchi: Professor

<sup>6</sup>Department of Laboratory Medicine, Hamamatsu University School of Medicine, 1-20-1, Handayama, Higashi-ku, Hamamatsu, 431-3192, Japan.

Masato Maekawa: Professor

**Correspondence:** Ryosuke Sato, MD, Department of Endocrinology and Metabolism,

Division of Internal Medicine II, Hamamatsu University School of Medicine, 1-20-1,

Handayama, Higashi-ku, Hamamatsu, 431-3192, Japan. Tel: +81-53-435-2385; Fax:

+81-53-435-2386; E-mail: ryos@hama-med.ac.jp

Word counts for the abstract: 298

Word counts for the manuscript: 2430

The number of Bibliography: 35

The number of figures: 2

The number of tables: 3

**Keywords:** diabetes mellitus, very low birth weight (VLBW), small for gestational age

(SGA), gender difference, oral glucose tolerance test (OGTT)

**ABSTRACT**

**Objectives:** To investigate glucose regulation in young adults with very low birth weight (VLBW; <1500g) in an Asian population.

**Design:** Cross-sectional, observational study.

**Setting:** A general hospital in Hamamatsu, Japan.

**Participants:** 111 young adults (42 men and 69 women; aged 19-30 years) born with VLBW between 1980 and 1990. Participants underwent standard 75-g oral glucose tolerance test (OGTT).

**Primary and secondary outcome measures:** The primary outcomes were glucose and insulin levels during OGTT, and risk factors for a category of hyperglycemia defined as follows: diabetes mellitus; impaired glucose tolerance (IGT); impaired fasting glycemia (IFG); and non-diabetes/IGT/IFG with elevated 1-hour glucose levels (>8.6 mmol/l). The secondary outcomes were the pancreatic beta cell function (insulinogenic index and homeostasis model of assessment for beta cell [HOMA- $\beta$ ]), and insulin resistance (homeostasis model of assessment for insulin resistance [HOMA-IR]).

**Results:** Of 111 young adults with VLBW, 21 subjects (19%) had hyperglycemia: 1 had type 2 diabetes; 6 had IGT; 1 had IFG; and 13 had non-diabetes/IGT/IFG with elevated 1-hour glucose levels. In logistic regression analysis, male gender was an independent

1  
2  
3  
4  
5  
6 risk factor associated with hyperglycemia (OR: 3.34; 95%CI: 1.08-10.3; p=0.036). Male  
7  
8  
9 subjects had significantly higher levels of glucose and lower levels of insulin during  
10  
11  
12 OGTT than female subjects (p<0.001 for glucose and p=0.005 for insulin by repeated  
13  
14  
15 measures ANOVA). Pancreatic beta cell function was lower in men (insulinogenic  
16  
17  
18 index: p=0.002; HOMA- $\beta$ : p=0.001), although no gender difference was found in  
19  
20  
21 insulin resistance (HOMA-IR: p=0.477). In male subjects, logistic regression analysis  
22  
23  
24 showed that small for gestational age (SGA) was an independent risk factor associated  
25  
26  
27 with hyperglycemia (OR: 33.3; 95%CI: 1.67-662.6; p=0.022).

28  
29 **Conclusions:** 19% of individuals with VLBW already had hyperglycemia in young  
30  
31  
32 adulthood, and male gender was a significant independent risk factor of hyperglycemia.  
33  
34  
35 In male young adults with VLBW, SGA was associated with hyperglycemia.  
36  
37  
38  
39  
40  
41  
42  
43  
44  
45  
46  
47  
48  
49  
50  
51  
52  
53  
54  
55  
56  
57  
58  
59  
60

## ARTICLE SUMMARY

### Article focus

- Neonatal intensive care has improved the survival rate for very low birth weight infants (VLBW; birth weight <1500g) in recent decades, and the first generation of VLBW infants have only recently reached young adulthood.
- Only a few studies have shown that VLBW (or preterm) is associated with glucose intolerance in Caucasian young adults, while glucose regulation in Asian young adults with VLBW is still uncertain.
- The present study investigated glucose regulation in young adults with VLBW in an Asian population, and determined the factors associated with hyperglycemia.

### Key messages

- Of 111 young adults with VLBW, 19% of individuals already had hyperglycemia (type 2 diabetes, IGT, IFG, and non-diabetes/IGT/IFG with elevated 1-hour glucose levels).
- Male gender was a significant independent risk factor of hyperglycemia in young adults with VLBW.
- Small for gestational age (SGA) was associated with hyperglycemia particularly in



1  
2  
3  
4  
5  
6 male young adults with VLBW.  
7  
8  
9  
10

### 11 **Strengths and limitations of this study**

- 12
- 13 ■ This is the first study assessing the glucose regulation in young adults with VLBW
  - 14
  - 15 in an Asian population.
  - 16
  - 17
  - 18
  - 19
  - 20 ■ This study does not provide information on postnatal growth patterns, which have
  - 21
  - 22 been shown to be associated with later hyperglycemia in previous studies.
  - 23
  - 24
  - 25
  - 26 ■ The study design with no control subjects makes it impossible to address the
  - 27
  - 28 delayed impact of VLBW itself on glucose regulation.
  - 29
  - 30
  - 31
  - 32
  - 33
  - 34
  - 35
  - 36
  - 37
  - 38
  - 39
  - 40
  - 41
  - 42
  - 43
  - 44
  - 45
  - 46
  - 47
  - 48
  - 49
  - 50
  - 51
  - 52
  - 53
  - 54
  - 55
  - 56
  - 57
  - 58
  - 59
  - 60

## INTRODUCTION

In recent decades, progression of neonatal intensive care has dramatically increased the survival rate of very low birth weight (VLBW; birth weight <1500g) infants worldwide.<sup>1</sup> A lot of them have grown up into young adult (now in their twenties or thirties). To date, epidemiological studies have shown an association between low birth weight and type 2 diabetes and cardiovascular disease in later life.<sup>2-4</sup> Fetal malnutrition in the gestational period, which prevents appropriate fetal growth in utero, is thought to provoke thrifty phenotype in premature babies. This phenotype is assumed to predispose them to subsequent metabolic disorders. For this reason, to foresee the later risk of type 2 diabetes is very crucial for VLBW infants, which would lead to prevention of type 2 diabetes by early intervention in their lifestyle.<sup>5-7</sup>

The first generation of VLBW infants have only recently reached young adulthood. A few studies have shown that VLBW (or preterm) is associated with glucose intolerance in young adulthood in Caucasian populations,<sup>8,9</sup> while the glucose regulation in Asian young adults with VLBW remains uncertain. To clarify the characteristics of glucose metabolism in young adults with VLBW in an Asian population, we investigated glucose regulation in 111 young adults with VLBW by performing detailed oral glucose tolerance test (OGTT), which is useful for evaluation of early signs of glucose

1  
2  
3  
4  
5  
6 intolerance.

## 7 8 9 10 11 12 **METHODS**

### 13 14 15 **Study Participants**

16  
17 The birth record database of Seirei Hamamatsu General Hospital (Hamamatsu, Japan)  
18 showed that 628 subjects were born with VLBW between 1980 and 1990, and were  
19 treated at a neonatal intensive care unit (**Figure 1**). VLBW infants were defined  
20 according to the World Health Organization (WHO) criteria: babies whose birth weight  
21 was less than 1500g. Out of the 628 subjects, 229 were excluded because of death  
22 (n=132) or severe neurodevelopmental impairment (n=97). To the remaining 399  
23 subjects, we sent letters which provided information regarding the study and requested  
24 their participation. Among the 399 letters, 98 were returned marked as address unknown  
25 (i.e. the remaining 301 letters were thought to reach their destinations). Consequently,  
26 111 subjects (aged 19-30 years) participated in the present study. All participants were  
27 Japanese. Small for gestational age (SGA) status was determined according to standards  
28 by a study group of the Health Ministry in Japan: a birth weight below the 10th  
29 percentile for gestational age.<sup>10</sup> The basal characteristics of participants at birth are  
30 summarized in **Table 1**.  
31  
32  
33  
34  
35  
36  
37  
38  
39  
40  
41  
42  
43  
44  
45  
46  
47  
48  
49  
50  
51  
52  
53  
54  
55  
56  
57  
58  
59  
60

## Measurements

All participants underwent a standard 75-g OGTT after a ten-hour overnight fast.

Plasma glucose and serum insulin concentrations were examined at 0, 30, 60, 90, 120, and 180 minutes during OGTT. Fasting glucose levels and 2-hour glucose levels were used for diagnosing diabetes mellitus, impaired glucose tolerance (IGT), and impaired fasting glycaemia (IFG) according to the WHO criteria.<sup>11</sup> Since it has been shown that 1-hour plasma glucose concentration is associated with future risk of type 2 diabetes and atherosclerosis, 1-hour plasma glucose above 8.6 mmol/l (155 mg/dl) was included as a category of hyperglycemia.<sup>12 13</sup> Reactive hypoglycemia during OGTT was defined as the level of plasma glucose less than 3.8 mmol/l which causes the response of counter-regulatory hormone release.<sup>14</sup>

We measured plasma glucose and serum insulin levels during OGTT with an autoanalyzer JCA-BM2250 (JEOL, Tokyo, Japan). Plasma glucose was measured by means of hexokinase method. The concentration of serum insulin was measured with chemiluminescent enzyme immunoassay (CLIA). Fasting blood samples were also drawn for other measurements; total cholesterol, high-density lipoprotein (HDL) cholesterol, low-density lipoprotein (LDL) cholesterol, triglyceride, and creatinine.

1  
2  
3  
4  
5  
6 Glycated haemoglobin A1c (HbA1c) was measured with high-performance liquid  
7  
8  
9 chromatography (HPLC) method using an automated glycohaemoglobin analyzer  
10  
11  
12 HLC-723G8 (Tosoh Bioscience, Tokyo, Japan). The values for HbA1c were converted  
13  
14  
15 from Japanese Diabetes Society (JDS) values into National Glycohaemoglobin  
16  
17  
18 Standardization Program (NGSP) equivalent values. NGSP equivalent values were  
19  
20  
21 calculated with the formula:  $\text{HbA1c (\%)} = \text{JDS value (\%)} + 0.4$ .<sup>15</sup>  
22  
23  
24  
25

### 26 **Calculations and Statistical analysis**

27  
28  
29 Pancreatic beta cell function was evaluated by both insulinogenic index and  
30  
31  
32 homeostasis model of assessment for beta cell (HOMA- $\beta$ ).<sup>16</sup> Insulinogenic index, the  
33  
34  
35 index of early-phase insulin secretion, was calculated as the ratio of the increment in  
36  
37  
38 insulin concentration to the increment in glucose concentration ( $[\text{30-min insulin}$   
39  
40  
41  $(\mu\text{U/ml}) - \text{fasting insulin}] / [\text{30-min glucose (mmol/l)} - \text{fasting glucose}]$ ). HOMA- $\beta$  was  
42  
43  
44 calculated as follows:  $20 \times \text{fasting insulin } (\mu\text{U/ml}) / [\text{fasting glucose (mmol/l)} - 3.5]$ .  
45  
46  
47 Insulin resistance was estimated by homeostasis model of assessment for insulin  
48  
49  
50 resistance (HOMA-IR):  $\text{fasting insulin } (\mu\text{U/ml}) \times \text{fasting glucose (mmol/l)} / 22.5$ .<sup>16</sup> The  
51  
52  
53 total amounts of glucose and insulin levels during OGTT were assessed by calculating  
54  
55  
56 areas under the curve (AUC) with trapezoid rules. The estimated glomerular filtration  
57  
58  
59  
60

1  
2  
3  
4  
5  
6 rate (eGFR) was calculated according to the following formula, as recommended by the

7  
8  
9 Japanese Society of Nephrology:  $eGFR \text{ (ml/min/1.73m}^2\text{)} = 194 \times [\text{Cre (mg/dl)}]^{-1.094} \times$   
10  
11  
12  $[\text{Age (years)}]^{-0.287}$  ( $\times 0.739$  if the subject is a woman).<sup>17</sup>  
13

14  
15 Quantitative variables were expressed as mean and standard deviation (SD) or 95%  
16  
17 confidence interval (CI); categorical variables were presented as number and percentage.  
18  
19 Differences between groups were compared using the Student's t-test, the  
20  
21 Mann–Whitney U test, the Pearson's  $\chi^2$  test, or the repeated measures analysis of  
22  
23 variance (ANOVA) as appropriate. The data on insulin levels during OGTT were  
24  
25 logarithmically transformed before the repeated measures ANOVA. Logistic regression  
26  
27 analysis which included gender, family history of diabetes within the second degree,  
28  
29 BMI, gestational age, birth weight, and SGA/AGA (appropriate for gestational age) was  
30  
31 performed to estimate odds ratios for the category of hyperglycemia. For the further  
32  
33 investigation into glucose regulation, multiple linear regression analysis was conducted.  
34  
35 Gender, family history of diabetes, BMI, gestational age, birth weight, and SGA/AGA  
36  
37 were included in the model. The data on HOMA- $\beta$ , HOMA-IR, Insulinogenic Index,  
38  
39 and Glucose<sub>AUC</sub> were logarithmically transformed before analysis to meet the  
40  
41 assumptions of normality. A p-value of less than 0.05 was defined as statistically  
42  
43 significant. All analyses were conducted using SAS software version 9.2 (SAS Institute,  
44  
45  
46  
47  
48  
49  
50  
51  
52  
53  
54  
55  
56  
57  
58  
59  
60

1  
2  
3  
4  
5  
6 Cary, North Carolina, USA) and the statistical software R version 2.12.2  
7  
8  
9 (http://www.r-project.org).  
10

## 11 12 13 14 15 **RESULTS**

16  
17 The basic characteristics of participants at study assessment are shown in **Table 1**. Of  
18  
19 111 young adults with VLBW, 21 subjects (19%) had hyperglycemia: one had type 2  
20  
21 diabetes; six had impaired glucose tolerance (IGT); one had impaired fasting glycaemia  
22  
23 (IFG); 13 non-diabetes/IGT/IFG subjects had elevated 1-hour glucose levels (>8.6  
24  
25 mmol/l). Hyperglycemia was more frequent in men than women (26.2 % for men vs  
26  
27 14.5 % for women). In the logistic regression analysis adjusted for family history of  
28  
29 diabetes within the second degree, BMI, gestational age, birth weight and SGA/AGA,  
30  
31 male gender was a statistically significant independent factor associated with  
32  
33 hyperglycemia (Odds ratio: 3.34; 95% CI: 1.08-10.3; p= 0.036). BMI at study  
34  
35 assessment was also associated with hyperglycemia (**Table 2**).  
36  
37  
38  
39  
40  
41  
42  
43  
44  
45  
46  
47  
48

### 49 **Gender difference**

50  
51 As male gender was a significant independent risk factor of hyperglycemia, we  
52  
53 evaluated the differences in glucose regulation between men and women in the sample  
54  
55  
56  
57  
58  
59  
60

1  
2  
3  
4  
5  
6 group. **Figure 2** shows the glucose and insulin response during OGTT in men and  
7  
8  
9 women. Male subjects had significantly higher levels of glucose during OGTT than  
10  
11  
12 female subjects ( $p < 0.001$  by repeated measures ANOVA). In terms of insulin levels,  
13  
14  
15 male subjects had lower levels of insulin during OGTT than female subjects ( $p = 0.005$   
16  
17  
18 by repeated measures ANOVA). Glucose<sub>AUC</sub> during OGTT tended to be higher in male  
19  
20  
21 subjects (**Table 3**). As for the function of insulin secretion, insulinogenic index and  
22  
23  
24 HOMA- $\beta$  were significantly lower in men than in women. Insulin<sub>AUC</sub> also showed a  
25  
26  
27 tendency to be lower in male subjects. Reactive hypoglycemia during OGTT tended to  
28  
29  
30 be frequent in men. The differences in the mean values of HbA1c and HOMA-IR were  
31  
32  
33 not statistically significant. There were no significant gender differences in gestational  
34  
35  
36 age ( $p = 0.145$ ), birth weight ( $p = 0.168$ ), age at study assessment ( $p = 0.845$ ), BMI  
37  
38  
39 ( $p = 0.879$ ), the proportion of SGA ( $p = 0.756$ ), and that of family history of diabetes  
40  
41  
42 within the second degree ( $p = 0.516$ ). The variables for glucose metabolism in men and  
43  
44  
45 women are summarized in **Table 3**.

46  
47 We evaluated the associations between gender and the variables of glucose metabolism  
48  
49  
50 by multiple linear regression analysis. Adjustments were made for family history of  
51  
52  
53 diabetes within the second degree, BMI, gestational age, birth weight, and SGA/AGA.  
54  
55  
56 In this analysis, male gender had inverse associations with HOMA- $\beta$  ( $\beta$ : -0.336; 95%



1  
2  
3  
4  
5  
6 CI: -0.509 to -0.163;  $p < 0.001$ ) and insulinogenic index ( $\beta$ : -0.195; 95% CI: -0.344 to  
7  
8  
9 -0.047;  $p=0.01$ ). Glucose<sub>AUC</sub> during OGTT tended to be positively associated with male  
10  
11  
12 gender ( $\beta$ : 0.056; 95% CI: -0.0047 to 0.116;  $p=0.071$ ).

13  
14  
15 In male subjects, after an adjustment for family history of diabetes, BMI, gestational  
16  
17  
18 age, and birth weight, the logistic regression analysis showed that SGA was a  
19  
20  
21 statistically significant independent factor associated with hyperglycemia (Odds ratio:  
22  
23  
24 33.3; 95% CI: 1.67-662.6;  $p=0.022$ ).

## 25 26 27 28 29 **DISCUSSION**

30  
31  
32 To the best of our knowledge, this is the first study assessing the glucose regulation in  
33  
34  
35 young adults with VLBW in an Asian population. Our study has indicated that 19% of  
36  
37  
38 young adults with VLBW already had hyperglycemia: type 2 diabetes; IGT; IFG; and  
39  
40  
41 non-diabetes/IGT/IFG with high 1-hour plasma glucose level. A report from the  
42  
43  
44 Japanese Ministry of Health, Welfare, and Labour in 2007 showed that of 204 general  
45  
46  
47 young adults (aged 20-29 years), 2 individuals (0.98%) had high levels of HbA1c (more  
48  
49  
50 than 6.0%; NGSP equivalent values),<sup>18</sup> while 3.6% of young adults with VLBW had the  
51  
52  
53 HbA1c values more than 6.0% in the present study. In a previous study, Hovi et al.  
54  
55  
56 reported that VLBW infants in young adulthood had higher indexes of glucose  
57  
58  
59  
60

1  
2  
3  
4  
5  
6 intolerance compared with term infants.<sup>9</sup> A recent epidemiological study has also shown  
7  
8 that preterm birth is associated with an increased risk of diabetes in young adults.<sup>8</sup> On  
9  
10 the other hand, a study in the Netherlands showed that preterm birth was not associated  
11  
12 with reduced insulin sensitivity in young adulthood.<sup>19</sup> The findings of that study may be  
13  
14 biased by the way of recruiting the control subjects born at term. Our findings would be  
15  
16 in line with the standpoint of high prevalence of hyperglycemia in premature infants in  
17  
18 young adulthood, although absence of control subjects presents a limitation of  
19  
20 demonstrating the impact of VLBW itself on glucose regulation.  
21  
22  
23  
24  
25  
26  
27

28  
29 We have also found that male subjects had higher glucose levels during OGTT than  
30  
31 females. Previous studies in the general population showed that women had higher  
32  
33 postload glucose levels than men, which were explained by differences in body size.<sup>20 21</sup>  
34  
35 During standard 75-g OGTT, men and women take the same amount of glucose, which  
36  
37 is thought to be high dosage for women relative to their body size. In our study,  
38  
39 however, men had significantly higher levels of both fasting and postload glucose  
40  
41 concentrations during OGTT. Moreover, male gender was associated with lower beta  
42  
43 cell function and the risk of glucose intolerance. These findings might indicate that men  
44  
45 with VLBW are more predisposed to diabetes than women; indeed, recent studies have  
46  
47 shown that male premature infants are more vulnerable than females.<sup>22-27</sup> In particular,  
48  
49  
50  
51  
52  
53  
54  
55  
56  
57  
58  
59  
60

1  
2  
3  
4  
5  
6 the male sex is associated with various adverse outcomes including death,<sup>25 27</sup>  
7  
8  
9 respiratory dysfunction,<sup>22</sup> intraventricular hemorrhage,<sup>24</sup> autism spectrum,<sup>23</sup> and  
10  
11 neurodevelopmental impairment.<sup>26</sup> Interestingly, in the present study, the mean value of  
12  
13 height (155cm) in women with VLBW is close to the average value of the Japanese  
14  
15 female population (158cm), whereas men with VLBW (164cm) were found to be  
16  
17 shorter compared to the Japanese male population (171cm) (average height data of  
18  
19 Japanese population were drawn from the report by the Ministry of Education, Culture,  
20  
21 Sports, Science, and Technology in Japan).<sup>28</sup> In a previous study, young adults who had  
22  
23 been born SGA were shorter and had higher glucose levels than those with a normal  
24  
25 birth weight.<sup>29</sup> Reduced final height might be long term consequences of intrauterine  
26  
27 retardation, which would also influence glucose regulation. Further investigation is  
28  
29 needed to clarify whether the influence of VLBW on physical growth is more  
30  
31 remarkable in male than female infants, and elucidate the relationship between physical  
32  
33 growth and glucose regulation.  
34  
35  
36  
37  
38  
39  
40  
41  
42  
43  
44  
45

46 Previous studies have shown that SGA itself is associated with glucose intolerance.<sup>30</sup>  
47  
48 In our study, SGA was not significantly associated with hyperglycemia in total subjects,  
49  
50 but was associated in male subjects. The influence of SGA on glucose regulation in  
51  
52 young adults with VLBW might be stronger in male than females. It is possible that this  
53  
54  
55  
56  
57  
58  
59  
60

1  
2  
3  
4  
5  
6 gender difference in glucose regulation is owing to the gender difference in the strength  
7  
8  
9 of SGA effect.  
10

### 11 12 13 14 **Strength and weakness of the study** 15

16  
17 The major strength of our study is a well-characterized cohort of subjects with VLBW,  
18  
19 who are quite rare in the general population (approximately 0.5% in this generation).<sup>31</sup>  
20  
21

22  
23 Our study includes a relatively large number of young adults with VLBW, and the  
24  
25 individuals with profound complications were carefully excluded in the recruiting  
26  
27 process. In addition, as participants in the cohort were all Japanese, their racial  
28  
29 homogeneity made considerations of ethnic differences in glucose regulation  
30  
31 unnecessary. To date, the glucose regulation of Asian young adults with VLBW has  
32  
33 been uncertain. Our findings would be useful to clinicians and researchers, and  
34  
35 stimulate future large-scale prospective cohort studies in Asian populations.  
36  
37  
38  
39  
40  
41  
42

43  
44 In the present study, we could not obtain information regarding the growth rate in  
45  
46 childhood of all participants. This is a major limitation of the study. The postnatal  
47  
48 growth pattern in infancy has been shown to be associated with later glucose  
49  
50 intolerance.<sup>32-35</sup> The clinical records of participants were written 20 to 30 years ago, and  
51  
52  
53  
54  
55 some of them were no longer preserved. Additionally, maternal factors such as advanced  
56  
57  
58  
59  
60

1  
2  
3  
4  
5  
6 age, smoking, gestational diabetes, and perinatal complications were not available in the  
7  
8  
9 present study. These factors might have affected fetal malnutrition and subsequently led  
10  
11 to VLBW. In terms of subjects in the present study, our study has no control subjects,  
12  
13 presenting a limitation of demonstrating the impact of VLBW itself on glucose  
14  
15 regulation. Another concern of the study is selection bias. Of 301 VLBW subjects who  
16  
17 were thought to receive the invitation letters, 111 subjects (37%) participated in the  
18  
19 study ~~(37%)~~. The findings should be carefully interpreted taking into account the  
20  
21 possibility that the participants might not be representative of general young adults with  
22  
23 VLBW.  
24  
25  
26  
27  
28  
29  
30  
31  
32  
33  
34

### 35 **Future Perspective**

36  
37  
38 As neonatal intensive care is making steady progress, an increasing number of young  
39  
40 adults with VLBW worldwide will face a greater variety of health problems. Clinician  
41  
42 should be aware of the risk of hyperglycemia in young adults with VLBW, and follow  
43  
44 up them for a longer period of time. It may be worthwhile for them to check their  
45  
46 glucose metabolism with OGTT in their twenties or thirties, which would lead to early  
47  
48 intervention in their lifestyle and subsequently contribute to prevention of type 2  
49  
50 diabetes and cardiovascular disease.<sup>5-7</sup> In the present study, we have found that male  
51  
52  
53  
54  
55  
56  
57  
58  
59  
60

1  
2  
3  
4  
5  
6 gender was a significant independent risk factor of hyperglycemia in young adults with  
7  
8  
9 VLBW. In addition to the gender difference, future studies are required to focus on the  
10  
11  
12 factors affecting the glucose metabolism in VLBW infants.  
13

14  
15  
16  
17 **Acknowledgment:** The authors thank all the participants in this study; the pediatricians  
18  
19 who have treated the participants in their neonatal periods; the colleagues who made a  
20  
21 great contribution to the study as clinical research coordinators: Masahiro Asano,  
22  
23 Kikuko Tejima, Emiko Morita, Mari Suzuki, Kaoru Kikuchi, and Chieko Suzuki; the  
24  
25 colleagues who played vital roles by excellent technical assistance: Hiromi Kajima,  
26  
27 Takako Akiyama, and Masato Shouji; and Keisuke Ishii and Gregory O'Dowd for  
28  
29 encouraging advice on the present study.  
30  
31  
32  
33  
34  
35  
36  
37  
38  
39

40  
41 **Contributors:** RS and HW drafted the paper. RS conceived the study. RS and KS  
42  
43 developed the idea. RS, HW, KS, SO, RG, MM, and HN were involved in study design.  
44  
45 RS and KS participated in data acquisition. RS, HW, HM, EI, MT, and MM were  
46  
47 engaged in data analysis. All the authors contributed to the interpretation of the findings.  
48  
49  
50 All the authors were involved in the revision and approved the final version.  
51  
52  
53  
54

55  
56 **Funding:** This study was partly supported by grants from the Japan Society for the  
57  
58  
59  
60

1  
2  
3  
4  
5  
6 Promotion of Science (21390180) and from the Ministry of Health, Labour and Welfare  
7  
8  
9 in Japan (H23-Cardiovascular disease and Diabetes-011).

10  
11  
12 **Competing Interest:** None.

13  
14  
15 **Ethical approval:** The study was approved by the ethical committee of Seirei  
16  
17 Hamamatsu General Hospital. All participants provided written informed consent to  
18  
19 participate in the study.  
20  
21

22  
23  
24 **Data sharing statement:** Data will not be publically accessible. However, interested  
25  
26 individuals may contact the authors.  
27  
28  
29  
30  
31  
32  
33  
34  
35  
36  
37  
38  
39  
40  
41  
42  
43  
44  
45  
46  
47  
48  
49  
50  
51  
52  
53  
54  
55  
56  
57  
58  
59  
60

## REFERENCES

1. Field DJ, Dorling JS, Manktelow BN, et al. Survival of extremely premature babies in a geographically defined population: prospective cohort study of 1994-9 compared with 2000-5. *BMJ* 2008;336(7655):1221-3.
2. Barker DJ, Gluckman PD, Godfrey KM, et al. Fetal nutrition and cardiovascular disease in adult life. *Lancet* 1993;341(8850):938-41.
3. Kaijser M, Bonamy AK, Akre O, et al. Perinatal risk factors for diabetes in later life. *Diabetes* 2009;58(3):523-6.
4. Whincup PH, Kaye SJ, Owen CG, et al. Birth weight and risk of type 2 diabetes: a systematic review. *JAMA* 2008;300(24):2886-97.
5. Knowler WC, Barrett-Connor E, Fowler SE, et al. Reduction in the incidence of type 2 diabetes with lifestyle intervention or metformin. *N Engl J Med* 2002;346(6):393-403.
6. Eriksson KF, Lindgarde F. Prevention of type 2 (non-insulin-dependent) diabetes mellitus by diet and physical exercise. The 6-year Malmo feasibility study. *Diabetologia* 1991;34(12):891-8.
7. Tuomilehto J, Lindstrom J, Eriksson JG, et al. Prevention of type 2 diabetes mellitus by changes in lifestyle among subjects with impaired glucose tolerance. *N Engl J Med* 2001;344(18):1343-50.
8. Crump C, Winkleby MA, Sundquist K, et al. Risk of diabetes among young adults born preterm in Sweden. *Diabetes Care* 2011;34(5):1109-13.
9. Hovi P, Andersson S, Eriksson JG, et al. Glucose regulation in young adults with very low birth weight. *N Engl J Med* 2007;356(20):2053-63.
10. The study group of the Health Ministry in Japan. Fetal growth curves of Japanese, 1994. pp 61.
11. World Health Organization. Definition, diagnosis and classification of diabetes mellitus and its complications. Geneva: World Health Organization, 1999.
12. Abdul-Ghani MA, Abdul-Ghani T, Ali N, et al. One-hour plasma glucose concentration and the metabolic syndrome identify subjects at high risk for future type 2 diabetes. *Diabetes Care* 2008;31(8):1650-5.
13. Succurro E, Marini MA, Arturi F, et al. Elevated one-hour post-load plasma glucose levels identifies subjects with normal glucose tolerance but early carotid atherosclerosis. *Atherosclerosis* 2009;207(1):245-9.
14. Zammitt NN, Frier BM. Hypoglycemia in type 2 diabetes: pathophysiology, frequency, and effects of different treatment modalities. *Diabetes Care*



- 2005;28(12):2948-61.
15. The Committee of Japan Diabetes Society on the diagnostic criteria of diabetes mellitus. Report of the Committee on the classification and diagnostic criteria of diabetes mellitus. *J Japan Diab Soc* 2010; 53 450-67.
  16. Matthews DR, Hosker JP, Rudenski AS, et al. Homeostasis model assessment: insulin resistance and beta-cell function from fasting plasma glucose and insulin concentrations in man. *Diabetologia* 1985;28(7):412-9.
  17. Matsuo S, Imai E, Horio M, et al. Revised equations for estimated GFR from serum creatinine in Japan. *Am J Kidney Dis* 2009;53(6):982-92.
  18. The Ministry of Health, Labour, and Welfare. The National Health and Nutrition Survey in Japan, 2007. pp 187.
  19. Willemsen RH, Leunissen RW, Stijnen T, et al. Prematurity is not associated with reduced insulin sensitivity in adulthood. *J Clin Endocrinol Metab* 2009;94(5):1695-700.
  20. Faerch K, Borch-Johnsen K, Vaag A, et al. Sex differences in glucose levels: a consequence of physiology or methodological convenience? The Inter99 study. *Diabetologia* 2010;53(5):858-65.
  21. Sicree RA, Zimmet PZ, Dunstan DW, et al. Differences in height explain gender differences in the response to the oral glucose tolerance test- the AusDiab study. *Diabet Med* 2008;25(3):296-302.
  22. Henderson-Smart DJ, Hutchinson JL, Donoghue DA, et al. Prenatal predictors of chronic lung disease in very preterm infants. *Arch Dis Child Fetal Neonatal Ed* 2006;91(1):F40-5.
  23. Johnson S, Hollis C, Kochhar P, et al. Autism spectrum disorders in extremely preterm children. *J Pediatr* 2010;156(4):525-31 e2.
  24. Mohamed MA, Aly H. Male gender is associated with intraventricular hemorrhage. *Pediatrics* 2010;125(2):e333-9.
  25. Morse SB, Wu SS, Ma C, et al. Racial and gender differences in the viability of extremely low birth weight infants: a population-based study. *Pediatrics* 2006;117(1):e106-12.
  26. Spinillo A, Montanari L, Gardella B, et al. Infant sex, obstetric risk factors, and 2-year neurodevelopmental outcome among preterm infants. *Dev Med Child Neurol* 2009;51(7):518-25.
  27. Tyson JE, Parikh NA, Langer J, et al. Intensive care for extreme prematurity--moving beyond gestational age. *N Engl J Med* 2008;358(16):1672-81.

- 1  
2  
3  
4  
5  
6  
7  
8  
9  
10  
11  
12  
13  
14  
15  
16  
17  
18  
19  
20  
21  
22  
23  
24  
25  
26  
27  
28  
29  
30  
31  
32  
33  
34  
35  
36  
37  
38  
39  
40  
41  
42  
43  
44  
45  
46  
47  
48  
49  
50  
51  
52  
53  
54  
55  
56  
57  
58  
59  
60
28. The Ministry of Education, Culture, Sports, Science, and Technology in Japan. A report of school health statistics, 2004.
  29. Leger J, Levy-Marchal C, Bloch J, et al. Reduced final height and indications for insulin resistance in 20 year olds born small for gestational age: regional cohort study. *BMJ* 1997;315(7104):341-7.
  30. Saenger P, Czernichow P, Hughes I, et al. Small for gestational age: short stature and beyond. *Endocr Rev* 2007;28(2):219-51.
  31. The Statistics and Information Department, Minister's Secretariat, Ministry of Health, Labour, and Welfare. Vital Statistics in Japan, 2009. Vol.1. pp 124-127.
  32. Crowther NJ, Cameron N, Trusler J, et al. Influence of catch-up growth on glucose tolerance and beta-cell function in 7-year-old children: results from the birth to twenty study. *Pediatrics* 2008;121(6):e1715-22.
  33. Eriksson JG, Osmond C, Kajantie E, et al. Patterns of growth among children who later develop type 2 diabetes or its risk factors. *Diabetologia* 2006;49(12):2853-8.
  34. Finken MJ, Keijzer-Veen MG, Dekker FW, et al. Preterm birth and later insulin resistance: effects of birth weight and postnatal growth in a population based longitudinal study from birth into adult life. *Diabetologia* 2006;49(3):478-85.
  35. Leunissen RW, Kerkhof GF, Stijnen T, et al. Timing and tempo of first-year rapid growth in relation to cardiovascular and metabolic risk profile in early adulthood. *JAMA* 2009;301(21):2234-42.

**Table 1. Clinical characteristics of young adults with very low birth weight (VLBW) at birth and at study assessment**

|                                                 | Total<br>(n=111) | Men (n=42)    |              | Women (n=69) |              |
|-------------------------------------------------|------------------|---------------|--------------|--------------|--------------|
|                                                 |                  | SGA* (n=14)   | AGA (n=28)   | SGA* (n=25)  | AGA (n=44)   |
| <b>At birth</b>                                 |                  |               |              |              |              |
| Gestational Age (wk)                            | 29.7 (3.1)       | 31.5 (3.7)    | 28.1 (1.9)   | 33.0 (2.6)   | 28.2 (1.9)   |
| Weight (g)                                      | 1152 (235)       | 1050 (223)    | 1149 (235)   | 1190 (239)   | 1166 (236)   |
| ELBW                                            | 33 (29.7)        | 6 (42.9)      | 10 (35.7)    | 7 (28.0)     | 10 (22.7)    |
| Birth from multiple pregnancy                   | 18 (16.2)        | 2 (21.4)      | 7 (25.0)     | 1 (4.0)      | 8 (18.1)     |
| <b>At study assessment</b>                      |                  |               |              |              |              |
| Age (yr)                                        | 24.8 (3.0)       | 24.9 (2.9)    | 24.6 (3.6)   | 23.9 (2.9)   | 25.4 (2.7)   |
| Family history of diabetes                      | 22 (19.8)        | 2 (14.3)      | 5 (17.9)     | 7 (28.0)     | 8 (18.2)     |
| Height (m)                                      | 1.58 (0.07)      | 1.60 (0.06)   | 1.66 (0.06)  | 1.54 (0.06)  | 1.55 (0.05)  |
| Body Weight (kg)                                | 52.3 (10.1)      | 53.1 (8.8)    | 55.8 (8.9)   | 47.5 (8.3)   | 52.4 (11.3)  |
| BMI (kg/m <sup>2</sup> )                        | 20.9 (3.8)       | 20.8 (3.2)    | 20.3 (2.8)   | 20.1 (3.0)   | 21.7 (4.7)   |
| Blood pressure (mmHg)                           |                  |               |              |              |              |
| Systolic                                        | 118 (16)         | 120 (18)      | 121 (17)     | 115 (12)     | 117 (16)     |
| Diastolic                                       | 70 (11)          | 69 (15)       | 69 (11)      | 69 (11)      | 71 (11)      |
| Cholesterol (mg/dl)                             |                  |               |              |              |              |
| Total                                           | 184.8 (31.3)     | 210.6 (52.0)  | 183.4 (25.2) | 180.4 (27.2) | 179.9 (25.1) |
| LDL                                             | 104.3 (28.4)     | 126.9 (48.6)  | 104.8 (24.8) | 100.3 (21.5) | 99.0 (22.6)  |
| HDL                                             | 65.7 (13.3)      | 63.2 (14.0)   | 64.6 (14.1)  | 64.6 (15.1)  | 67.8 (11.6)  |
| Triglycerides (mg/dl)                           | 81.8 (72.2)      | 126.5 (139.9) | 81.0 (84.5)  | 85.4 (51.0)  | 65.9 (23.5)  |
| Renal function                                  |                  |               |              |              |              |
| Creatinine (mg/dl)                              | 0.66 (0.13)      | 0.76 (0.09)   | 0.80 (0.11)  | 0.59 (0.08)  | 0.58 (0.08)  |
| eGFR (ml/min/1.73 m <sup>2</sup> ) <sup>†</sup> | 104.6 (18.4)     | 105.5 (13.9)  | 101.8 (19.4) | 104.3 (18.2) | 106.3 (19.5) |

SGA, small for gestational age; AGA, appropriate for gestational age; ELBW, extremely low birth weight (<1000g); BMI, body mass index; eGFR, estimated glomerular filtration rate; LDL, low-density lipoprotein; HDL, high-density lipoprotein.

Data are expressed as mean (SD) or number (%).

1  
2  
3  
4  
5 \*Determined by a birth weight below the 10th percentile for gestational age according  
6 to standards defined by a study group of the Health Ministry in Japan.  
7

8 †Calculated according to the formula recommended by the Japanese Society of  
9 Nephrology:  $eGFR \text{ (ml/min/1.73m}^2\text{)} = 194 \times [\text{Cre (mg/dl)}]^{-1.094} \times [\text{Age (years)}]^{-0.287}$  ( $\times$   
10 0.739 if the subject is a woman).  
11  
12  
13  
14  
15  
16  
17  
18  
19  
20  
21  
22  
23  
24  
25  
26  
27  
28  
29  
30  
31  
32  
33  
34  
35  
36  
37  
38  
39  
40  
41  
42  
43  
44  
45  
46  
47  
48  
49  
50  
51  
52  
53  
54  
55  
56  
57  
58  
59  
60

For peer review only

**Table 2. Correlated factors for hyperglycemia\* in young adults with very low birth weight (VLBW) assessed by logistic regression analyses**

| Variable                           | Odds Ratio† | 95% CI      | P-value |
|------------------------------------|-------------|-------------|---------|
| <b>Gender (Male)</b>               | 3.34        | 1.08 - 10.3 | 0.036   |
| <b>Factors at birth</b>            |             |             |         |
| Gestational age (wk)               | 0.77        | 0.53 - 1.12 | 0.165   |
| Weight (0.1kg)                     | 1.39        | 0.96 - 2.02 | 0.085   |
| SGA                                | 2.56        | 0.37 - 17.5 | 0.340   |
| <b>Factors at study assessment</b> |             |             |         |
| Family history of diabetes         | 1.92        | 0.49 - 7.57 | 0.353   |
| BMI (kg/m <sup>2</sup> )           | 1.29        | 1.11 - 1.49 | 0.001   |

SGA, small for gestational age; BMI, body mass index.

\*A category of hyperglycemia includes Diabetes, IGT (impaired glucose tolerance), IFG (impaired fasting glycaemia), and Non-diabetes/IGT/IFG with elevated 1-hour glucose levels (> 8.6mmol/l).

†Each odds ratio is calculated from a model including gender, family history of diabetes, BMI, gestational age, birth weight, and SGA/AGA (appropriate for gestational age).

**Table 3. Gender differences in glucose regulation in young adults with very low birth weight (VLBW)**

|                                                           | Men (n=42)           | Women (n=69)          | P-value |
|-----------------------------------------------------------|----------------------|-----------------------|---------|
| Hyperglycemia                                             | 11 (26.2)            | 10 (14.5)             | 0.127   |
| Diabetes                                                  | 0                    | 1                     |         |
| IGT                                                       | 2                    | 4                     |         |
| IFG                                                       | 1                    | 0                     |         |
| Non-diabetes/IGT/IFG with elevated 1-hour glucose levels* | 8                    | 5                     |         |
| HbA1c (%)                                                 | 5.39 (5.31 - 5.47)   | 5.39 (5.31 - 5.47)    | 0.635   |
| HOMA- $\beta$                                             | 72.5 (59.0 - 86.0)   | 103 (87.2 - 119.6)    | 0.001   |
| HOMA-IR                                                   | 1.4 (1.14 - 1.69)    | 1.6 (1.29 - 1.90)     | 0.477   |
| Variable during OGTT                                      |                      |                       |         |
| Insulinogenic Index                                       | 1.1 (0.64 - 1.60)    | 1.4 (1.18 - 1.71)     | 0.002   |
| Glucose <sub>AUC</sub> (mmol/l $\times$ hr)               | 18.8 (17.9 - 19.7)   | 18.2 (17.3 - 19.0)    | 0.089   |
| Insulin <sub>AUC</sub> ( $\mu$ U/ml $\times$ hr)          | 135.3 (98.7 - 171.9) | 145.1 (121.7 - 168.6) | 0.052   |
| Reactive hypoglycemia                                     | 17 (40)              | 17 (25)               | 0.079   |

IGT, impaired glucose tolerance; IFG, impaired fasting glycemia; HOMA- $\beta$ , homeostasis model of assessment for beta cell; HOMA-IR, homeostasis model of assessment for insulin resistance.

Data are expressed as mean (95% CI) or number (%).

\*Defined as 1-hour glucose levels > 8.6mmol/l.

## Figure Legends

### Figure 1. Flow of participants through the study.

(There is no figure legend in Figure 1.)

### Figure 2. The gender differences of glucose and insulin levels during OGTT in young adults with very low birth weight (VLBW).

The top and bottom of the box indicate lower and upper quartiles; the line inside the box represents the median; the whiskers indicate the most extreme data points within 1.5 times of interquartile range from the box; dots indicate outliers. Male subjects had significantly higher levels of glucose and lower levels of insulin during OGTT than female subjects ( $p < 0.001$  for glucose and  $p = 0.005$  for insulin by repeated measure ANOVA).

**The numerical data of Figure 2.**

**Male (n=42)**

|                        | 0 (min)           | 30               | 60               | 90               | 120              | 180              |
|------------------------|-------------------|------------------|------------------|------------------|------------------|------------------|
| Plasma glucose (mg/dl) | 5.208<br>(0.3695) | 8.579<br>(1.272) | 7.167<br>(1.824) | 6.262<br>(1.523) | 5.749<br>(1.102) | 4.360<br>(1.205) |
| Insulin (microU/ml)    | 6.057<br>(3.519)  | 64.95<br>(64.53) | 53.70<br>(47.86) | 53.27<br>(49.61) | 49.84<br>(50.66) | 20.94<br>(24.37) |

**Female (n=69)**

|                        | 0 (min)           | 30               | 60               | 90               | 120              | 180              |
|------------------------|-------------------|------------------|------------------|------------------|------------------|------------------|
| Plasma glucose (mg/dl) | 4.930<br>(0.4266) | 7.529<br>(1.460) | 6.596<br>(1.946) | 6.178<br>(1.541) | 5.829<br>(1.487) | 4.881<br>(1.121) |
| Insulin (microU/ml)    | 7.090<br>(5.107)  | 66.22<br>(42.62) | 57.09<br>(51.97) | 54.95<br>(44.39) | 51.11<br>(39.85) | 31.82<br>(28.03) |

**Data are expressed as mean (SD).**



**Figure 1. Flow of Participants through the study.**



**Figure 2. The gender differences of glucose and insulin levels during OGTT in young adults with very low birth weight (VLBW).**

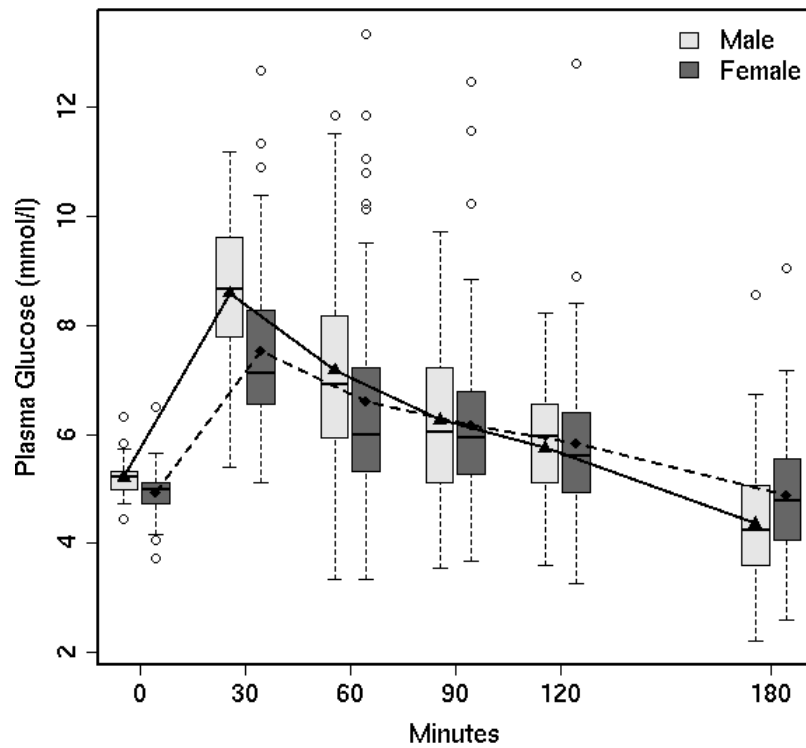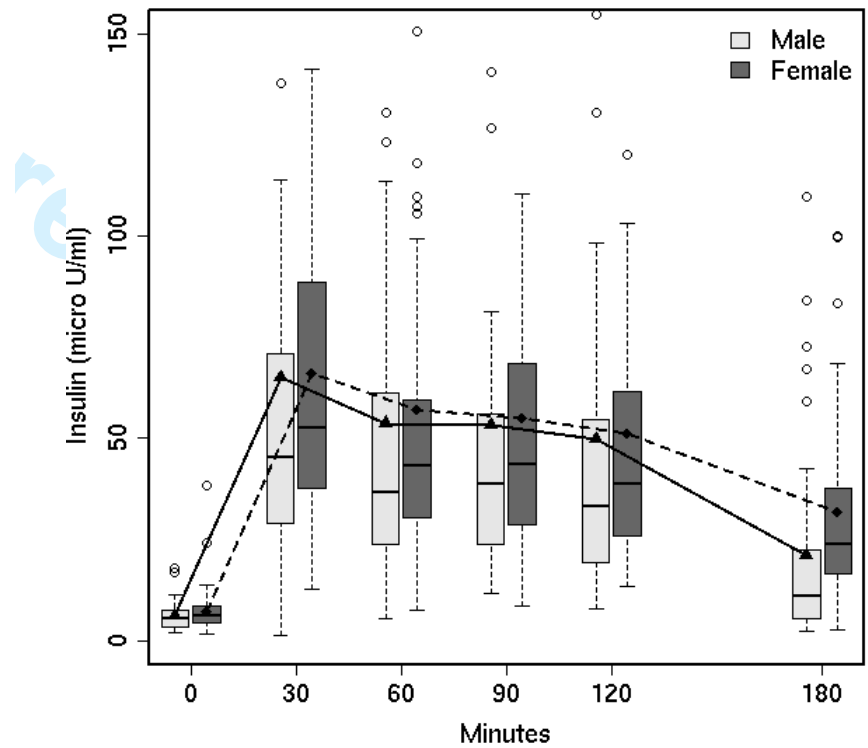

STROBE 2007 (v4) Statement—Checklist of items that should be included in reports of *cross-sectional studies*

| Section/Topic                | Item # | Recommendation                                                                                                                                                                       | Reported on page # |
|------------------------------|--------|--------------------------------------------------------------------------------------------------------------------------------------------------------------------------------------|--------------------|
| Title and abstract           | 1      | (a) Indicate the study's design with a commonly used term in the title or the abstract                                                                                               | 3                  |
|                              |        | (b) Provide in the abstract an informative and balanced summary of what was done and what was found                                                                                  | 3                  |
| <b>Introduction</b>          |        |                                                                                                                                                                                      |                    |
| Background/rationale         | 2      | Explain the scientific background and rationale for the investigation being reported                                                                                                 | 7                  |
| Objectives                   | 3      | State specific objectives, including any prespecified hypotheses                                                                                                                     | 7                  |
| <b>Methods</b>               |        |                                                                                                                                                                                      |                    |
| Study design                 | 4      | Present key elements of study design early in the paper                                                                                                                              | 8                  |
| Setting                      | 5      | Describe the setting, locations, and relevant dates, including periods of recruitment, exposure, follow-up, and data collection                                                      | 8                  |
| Participants                 | 6      | (a) Give the eligibility criteria, and the sources and methods of selection of participants                                                                                          | 8                  |
| Variables                    | 7      | Clearly define all outcomes, exposures, predictors, potential confounders, and effect modifiers. Give diagnostic criteria, if applicable                                             | 9-10               |
| Data sources/<br>measurement | 8*     | For each variable of interest, give sources of data and details of methods of assessment (measurement). Describe comparability of assessment methods if there is more than one group | n/a                |
| Bias                         | 9      | Describe any efforts to address potential sources of bias                                                                                                                            | 18                 |
| Study size                   | 10     | Explain how the study size was arrived at                                                                                                                                            | 8                  |
| Quantitative variables       | 11     | Explain how quantitative variables were handled in the analyses. If applicable, describe which groupings were chosen and why                                                         | 10                 |
| Statistical methods          | 12     | (a) Describe all statistical methods, including those used to control for confounding                                                                                                | 10-12              |
|                              |        | (b) Describe any methods used to examine subgroups and interactions                                                                                                                  | 13                 |
|                              |        | (c) Explain how missing data were addressed                                                                                                                                          | n/a                |
|                              |        | (d) If applicable, describe analytical methods taking account of sampling strategy                                                                                                   | n/a                |
|                              |        | (e) Describe any sensitivity analyses                                                                                                                                                | n/a                |
| <b>Results</b>               |        |                                                                                                                                                                                      |                    |

|                          |     |                                                                                                                                                                                                              |          |
|--------------------------|-----|--------------------------------------------------------------------------------------------------------------------------------------------------------------------------------------------------------------|----------|
| Participants             | 13* | (a) Report numbers of individuals at each stage of study—eg numbers potentially eligible, examined for eligibility, confirmed eligible, included in the study, completing follow-up, and analysed            | 8        |
|                          |     | (b) Give reasons for non-participation at each stage                                                                                                                                                         | 8        |
|                          |     | (c) Consider use of a flow diagram                                                                                                                                                                           | Figure 1 |
| Descriptive data         | 14* | (a) Give characteristics of study participants (eg demographic, clinical, social) and information on exposures and potential confounders                                                                     | Table 1  |
|                          |     | (b) Indicate number of participants with missing data for each variable of interest                                                                                                                          | n/a      |
| Outcome data             | 15* | Report numbers of outcome events or summary measures                                                                                                                                                         | n/a      |
| Main results             | 16  | (a) Give unadjusted estimates and, if applicable, confounder-adjusted estimates and their precision (eg, 95% confidence interval). Make clear which confounders were adjusted for and why they were included | 12-14    |
|                          |     | (b) Report category boundaries when continuous variables were categorized                                                                                                                                    | n/a      |
|                          |     | (c) If relevant, consider translating estimates of relative risk into absolute risk for a meaningful time period                                                                                             | n/a      |
| Other analyses           | 17  | Report other analyses done—eg analyses of subgroups and interactions, and sensitivity analyses                                                                                                               | 14       |
| <b>Discussion</b>        |     |                                                                                                                                                                                                              |          |
| Key results              | 18  | Summarise key results with reference to study objectives                                                                                                                                                     | 14-15    |
| Limitations              | 19  | Discuss limitations of the study, taking into account sources of potential bias or imprecision. Discuss both direction and magnitude of any potential bias                                                   | 17-18    |
| Interpretation           | 20  | Give a cautious overall interpretation of results considering objectives, limitations, multiplicity of analyses, results from similar studies, and other relevant evidence                                   | 14-18    |
| Generalisability         | 21  | Discuss the generalisability (external validity) of the study results                                                                                                                                        | 17       |
| <b>Other information</b> |     |                                                                                                                                                                                                              |          |
| Funding                  | 22  | Give the source of funding and the role of the funders for the present study and, if applicable, for the original study on which the present article is based                                                | 19       |

\*Give information separately for cases and controls in case-control studies and, if applicable, for exposed and unexposed groups in cohort and cross-sectional studies.

**Note:** An Explanation and Elaboration article discusses each checklist item and gives methodological background and published examples of transparent reporting. The STROBE checklist is best used in conjunction with this article (freely available on the Web sites of PLoS Medicine at <http://www.plosmedicine.org/>, Annals of Internal Medicine at <http://www.annals.org/>, and Epidemiology at <http://www.epidem.com/>). Information on the STROBE Initiative is available at [www.strobe-statement.org](http://www.strobe-statement.org).
